# Supplementary material
Source: PubMed Central journal article supplement (PMC4501476)
Supplement: NIHMS705858-supplement-Supplemenatry_materials.pdf [file NIHMS705858-supplement-Supplemenatry_materials.pdf]

## Genome-wide association study identifies five susceptibility loci for glioma

Sanjay Shete<sup>1\*</sup>, Fay J Hosking<sup>2\*</sup>, Lindsay B Robertson<sup>2</sup>, Sara E Dobbins<sup>2</sup>, Marc Sanson<sup>3</sup>, Beatrice Malmer<sup>4</sup>, Matthias Simon<sup>5</sup>, Yannick Marie<sup>3</sup>, Blandine Boisselier<sup>3</sup>, Jean-Yves Delattre<sup>3</sup>, Khe Hoang-Xuan<sup>3</sup>, Soufiane El Hallani<sup>3</sup>, Ahmed Idbaih<sup>3</sup>, Diana Zelenika<sup>6</sup>, Ulrika Andersson<sup>4</sup>, Roger Henriksson<sup>4</sup>, A Tommy Bergenheim<sup>7</sup>, Maria Feychting<sup>8</sup>, Stefan Lönn<sup>9</sup>, Anders Ahlbom<sup>7</sup>, Johannes Schramm<sup>5</sup>, Michael Linnebank<sup>10</sup>, Kari Hemminki<sup>11</sup>, Rajiv Kumar<sup>11</sup>, Sarah J Hepworth<sup>12</sup>, Amy Price<sup>2</sup>, Georgina Armstrong<sup>1</sup>, Yanhong Liu<sup>1</sup>, Xiangjun Gu<sup>1</sup>, Robert Yu<sup>1</sup>, Ching Lau<sup>15</sup>, Minouk Schoemaker<sup>14</sup>, Kenneth Muir<sup>13</sup>, Anthony Swerdlow<sup>14</sup>, Mark Lathrop<sup>6,16</sup>, Melissa Bondy<sup>1‡</sup>, Richard S Houlston<sup>2‡</sup>

1. Department of Epidemiology, University of Texas M.D. Anderson Cancer Center, Houston, Texas 77030, USA.

2. Section of Cancer Genetics, Institute of Cancer Research, Sutton, Surrey. UK.

3. Service de Neurologie Mazarin et INSERM U 711, Hôpital de la Salpêtrière 47, Bd de l'Hôpital 75 013 Paris. France.

4. Department of Radiation Sciences, Oncology, Umeå University, Sweden.

5. Neurochirurgische Universitätsklinik, Sigmund-Freud-Str. 25, 53105 Bonn, Germany.

6. Centre National de Génotypage, IG/CEA, 2 rue Gaston Crémieux CP 5721, 91057 Evry Cedex, France.

7. Department of Clinical Neuroscience, Umeå University, Sweden.

8. Institute of Environmental Medicine, Karolinska Institutet, Sweden.

9. Department of Medical Epidemiology and Biostatistics Karolinska Institutet, Sweden

10. Department of Neurology, University Hospital Zurich, Frauenklinikstrasse 26, CH-8091 Zurich, Switzerland.

11. Division of Molecular Genetic Epidemiology, German Cancer Research Center (DKFZ), Im Neuenheimer Feld 580, D-69120 Heidelberg, Germany.

12. Centre for Epidemiology and Biostatistics, Faculty of Medicine and Health, University of Leeds, UK.

13. Division of Epidemiology and Public Health, University of Nottingham Medical School, Queen's Medical Centre, Nottingham, UK.

14. Section of Epidemiology, Institute of Cancer Research, Sutton, UK.

15. Texas Children's Cancer Center, Baylor College of Medicine, Houston, Texas 77030, USA.

16. Foundation Jean Daussett-CEPH, 27 Rue Julliette Dodu, 75010 Paris, France

\*equal status at this position

‡Corresponding authors

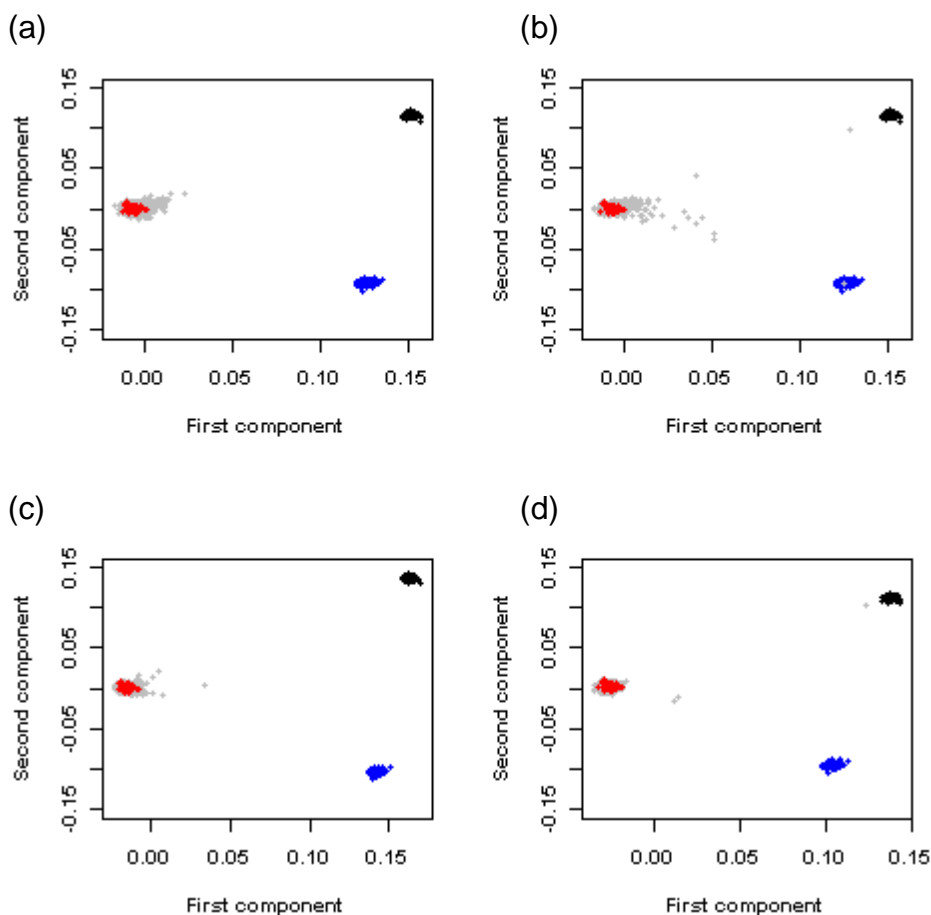

**Supplementary Figure 1a: Identification of individuals in the GWA scan of non-European ancestry.** The first two principal components of the analysis were plotted. HapMap CEU individuals are plotted in red; CHB+JPT are plotted in blue; YRI individuals are plotted in black; individuals in the GWA-UK and GWA-US are plotted in grey. GWA-US controls are plotted in (a), cases in (b); GWA-UK controls are plotted in (c) and cases in (d).

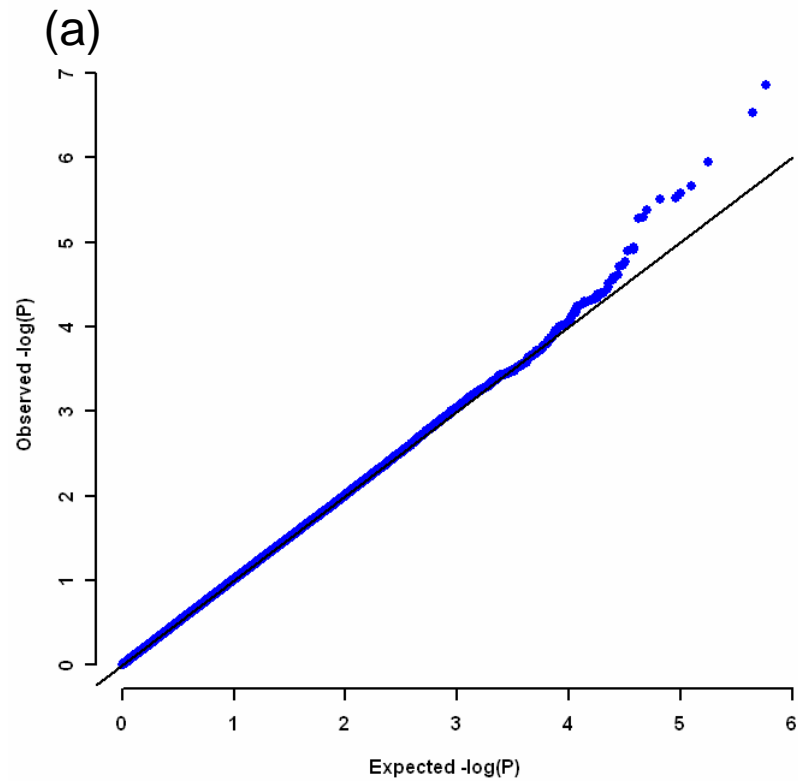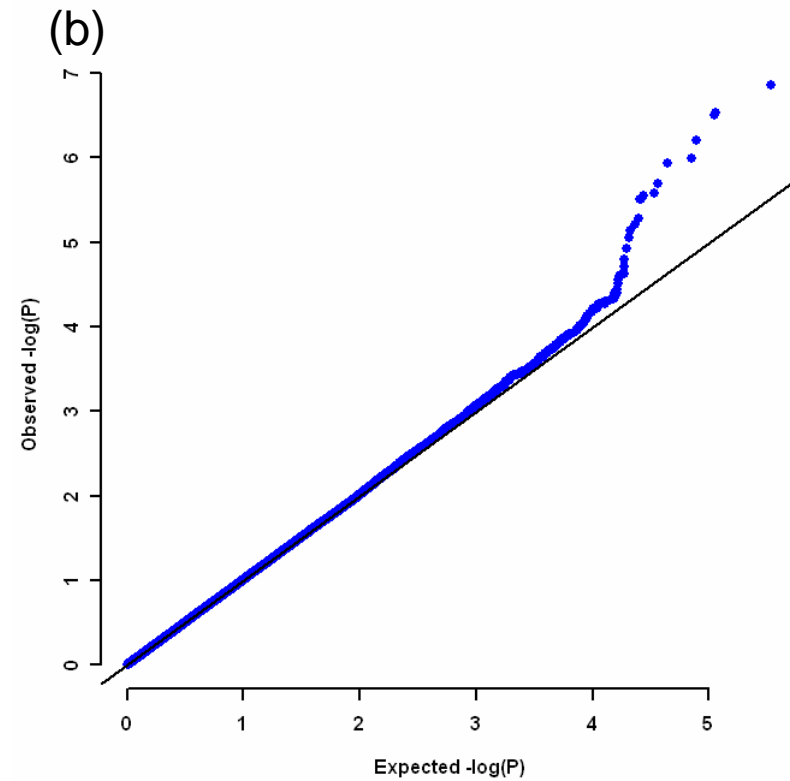

**Supplementary Figure 1b: Quantile-quantile (Q-Q) plot of Cochran-Armitage test for trend for the two GWA studies.** Results from UK-GWA are plotted in (a) and those from the US-GWA in (b). The black line represents the null hypothesis of no true association.

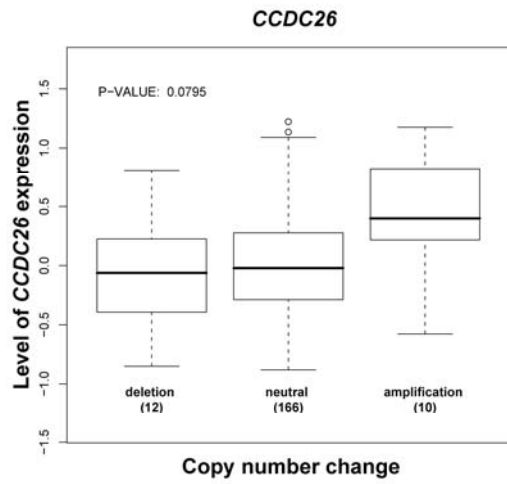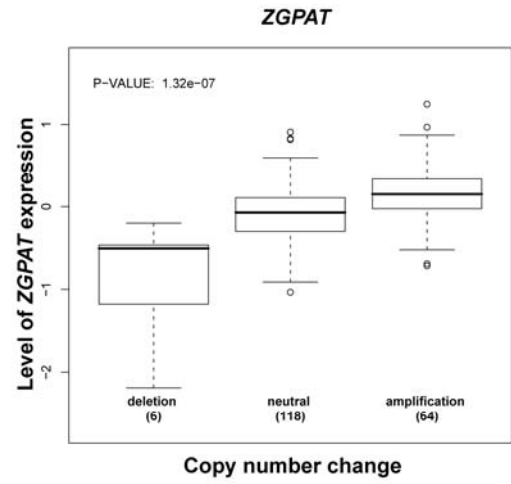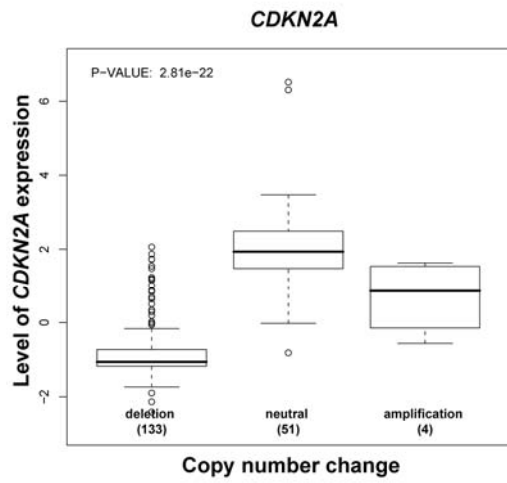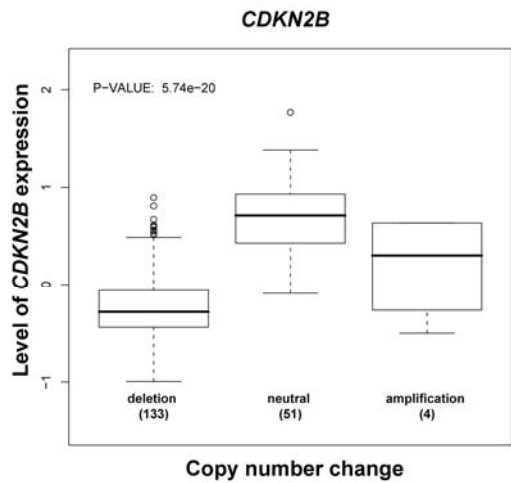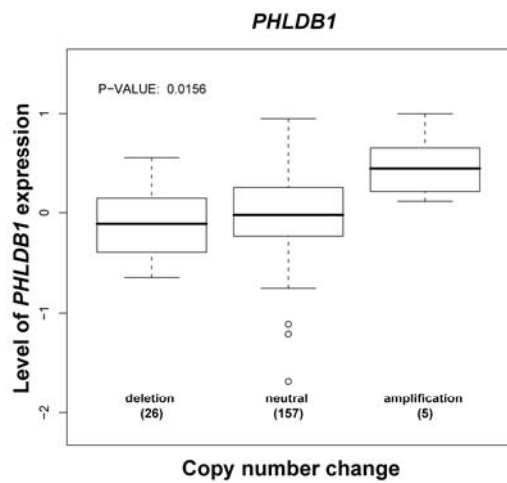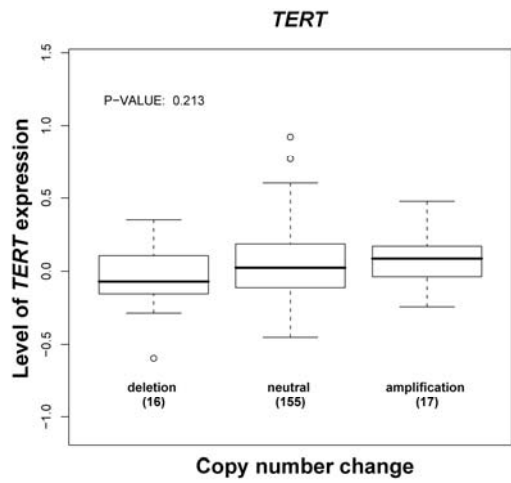

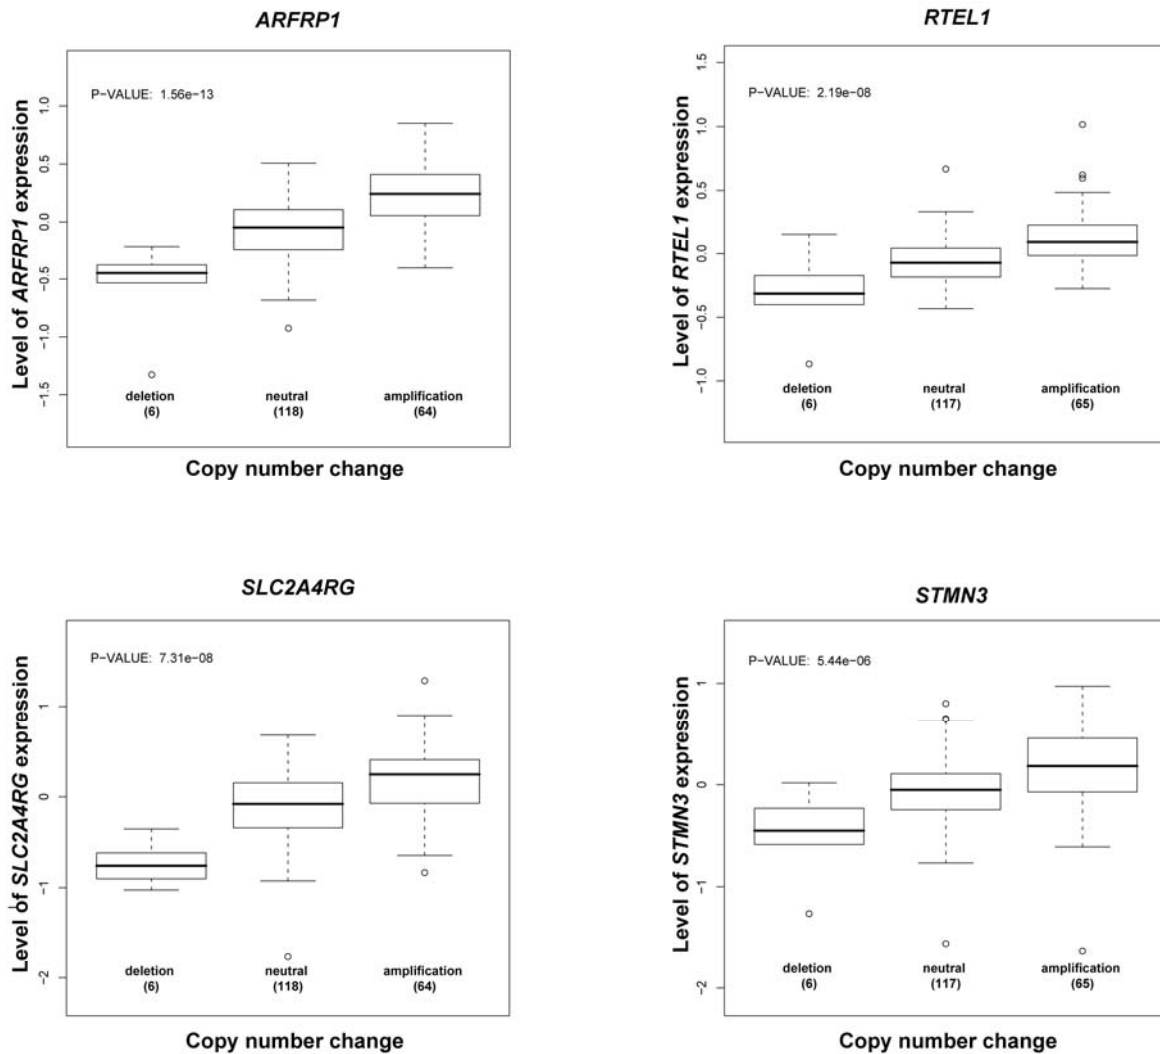

**Supplementary Figure 2a: 5p15.33 (*TERT*), 8q24.21 (*CCDC26*), 9p21 (*CDKN2A*, *CDKN2B*), 11q23.3 (*PHLDB1*) and 20q13.33 (*RTEL1*, *ARFRP1*, *STMN3*, *SLC2A4RG*, *ZGPAT*) copy number variation (CNV) and mRNA expression in glioma.** Plots show mRNA expression stratified by CNV status based on analysis of 188 glioblastoma multiforme (GBM) tumors. Expression data was derived from the MSKCC Cancer Genomics Data Portal (<http://cbio.mskcc.org/cancer-genomics-dataportal/>). MSKCC expression data was generated by combining GBM expression data from the The Cancer Genome Atlas. The bioconductor module CGHcall was used to determine CNV status from Agilent human genome CGH microarray data taken from TCGA data portal. It should be noted that rates of amplification and deletion for a set of randomly selected probes are 9.9% and 13.4% respectively in the tumors. Differences in the distribution of expression by SNP genotype were compared using a Wilcoxon-type test.

(a)

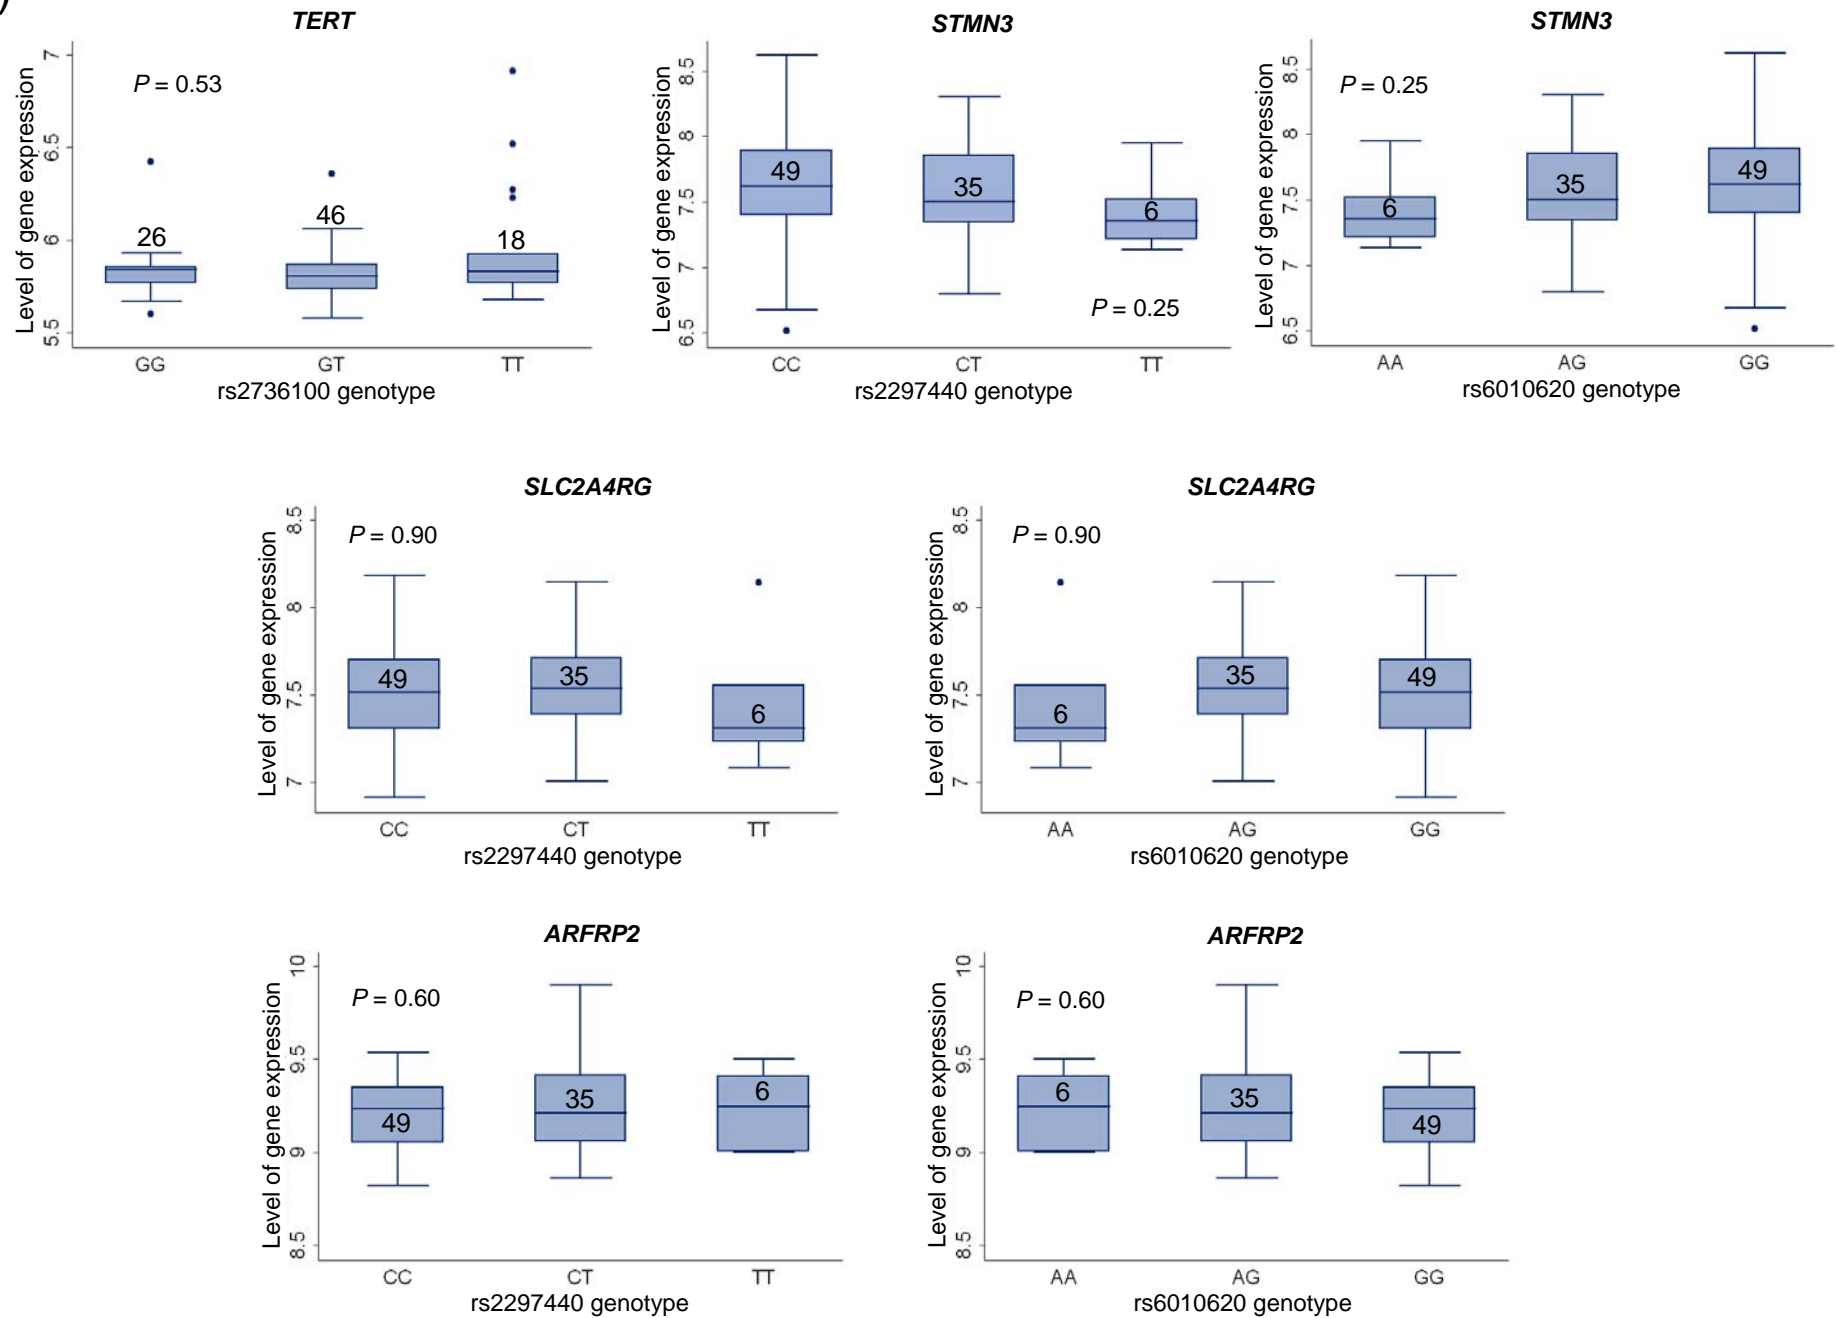

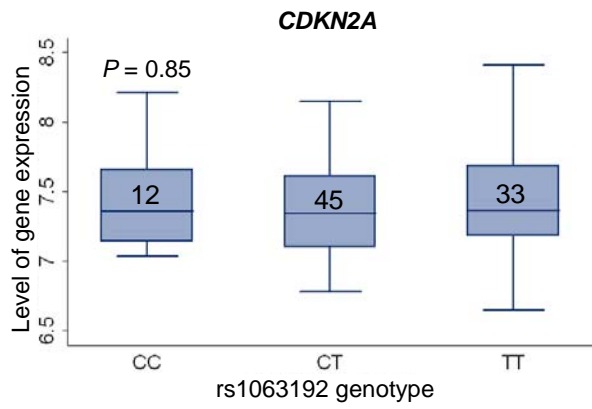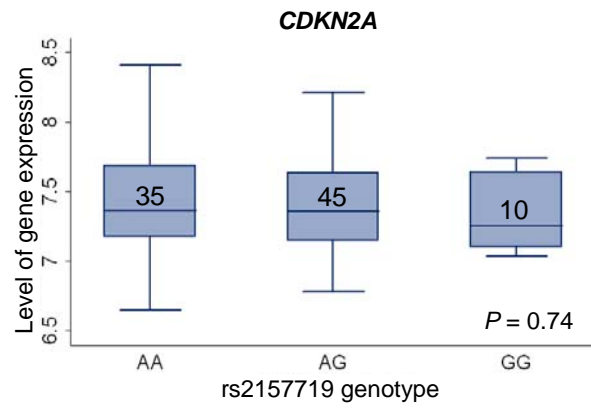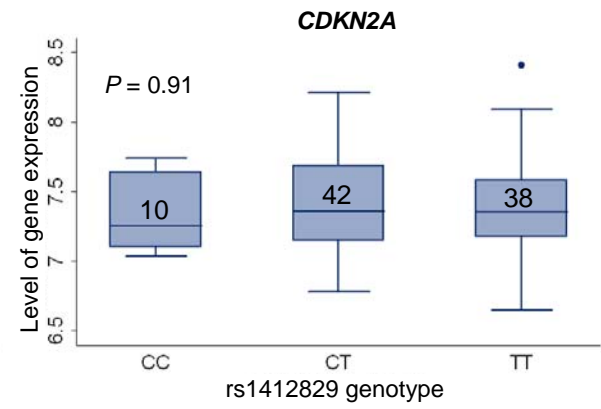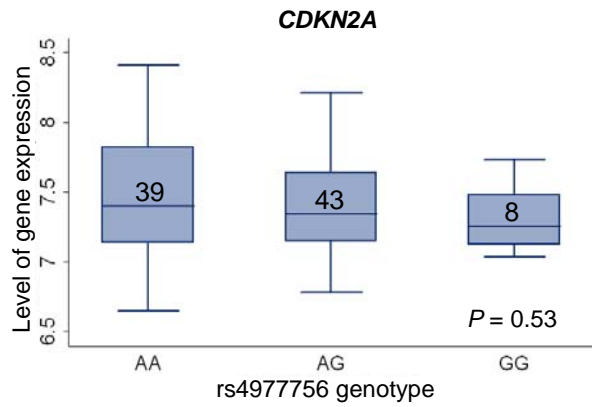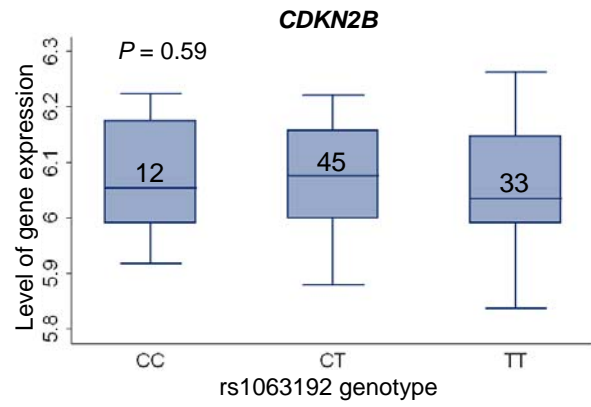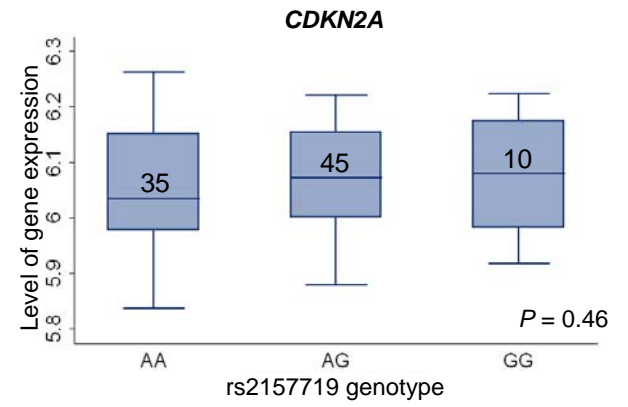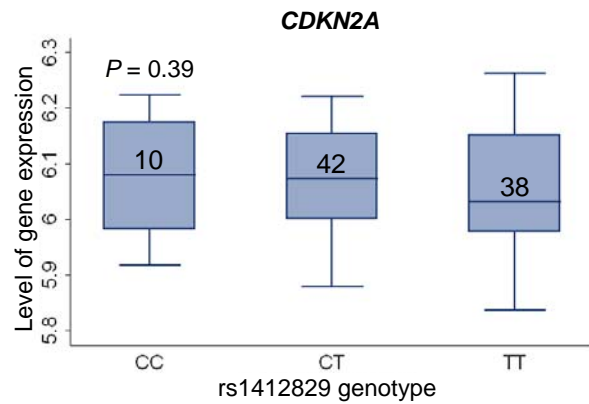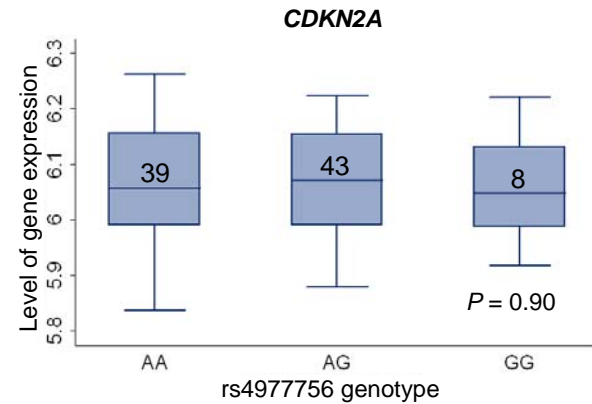

(b)

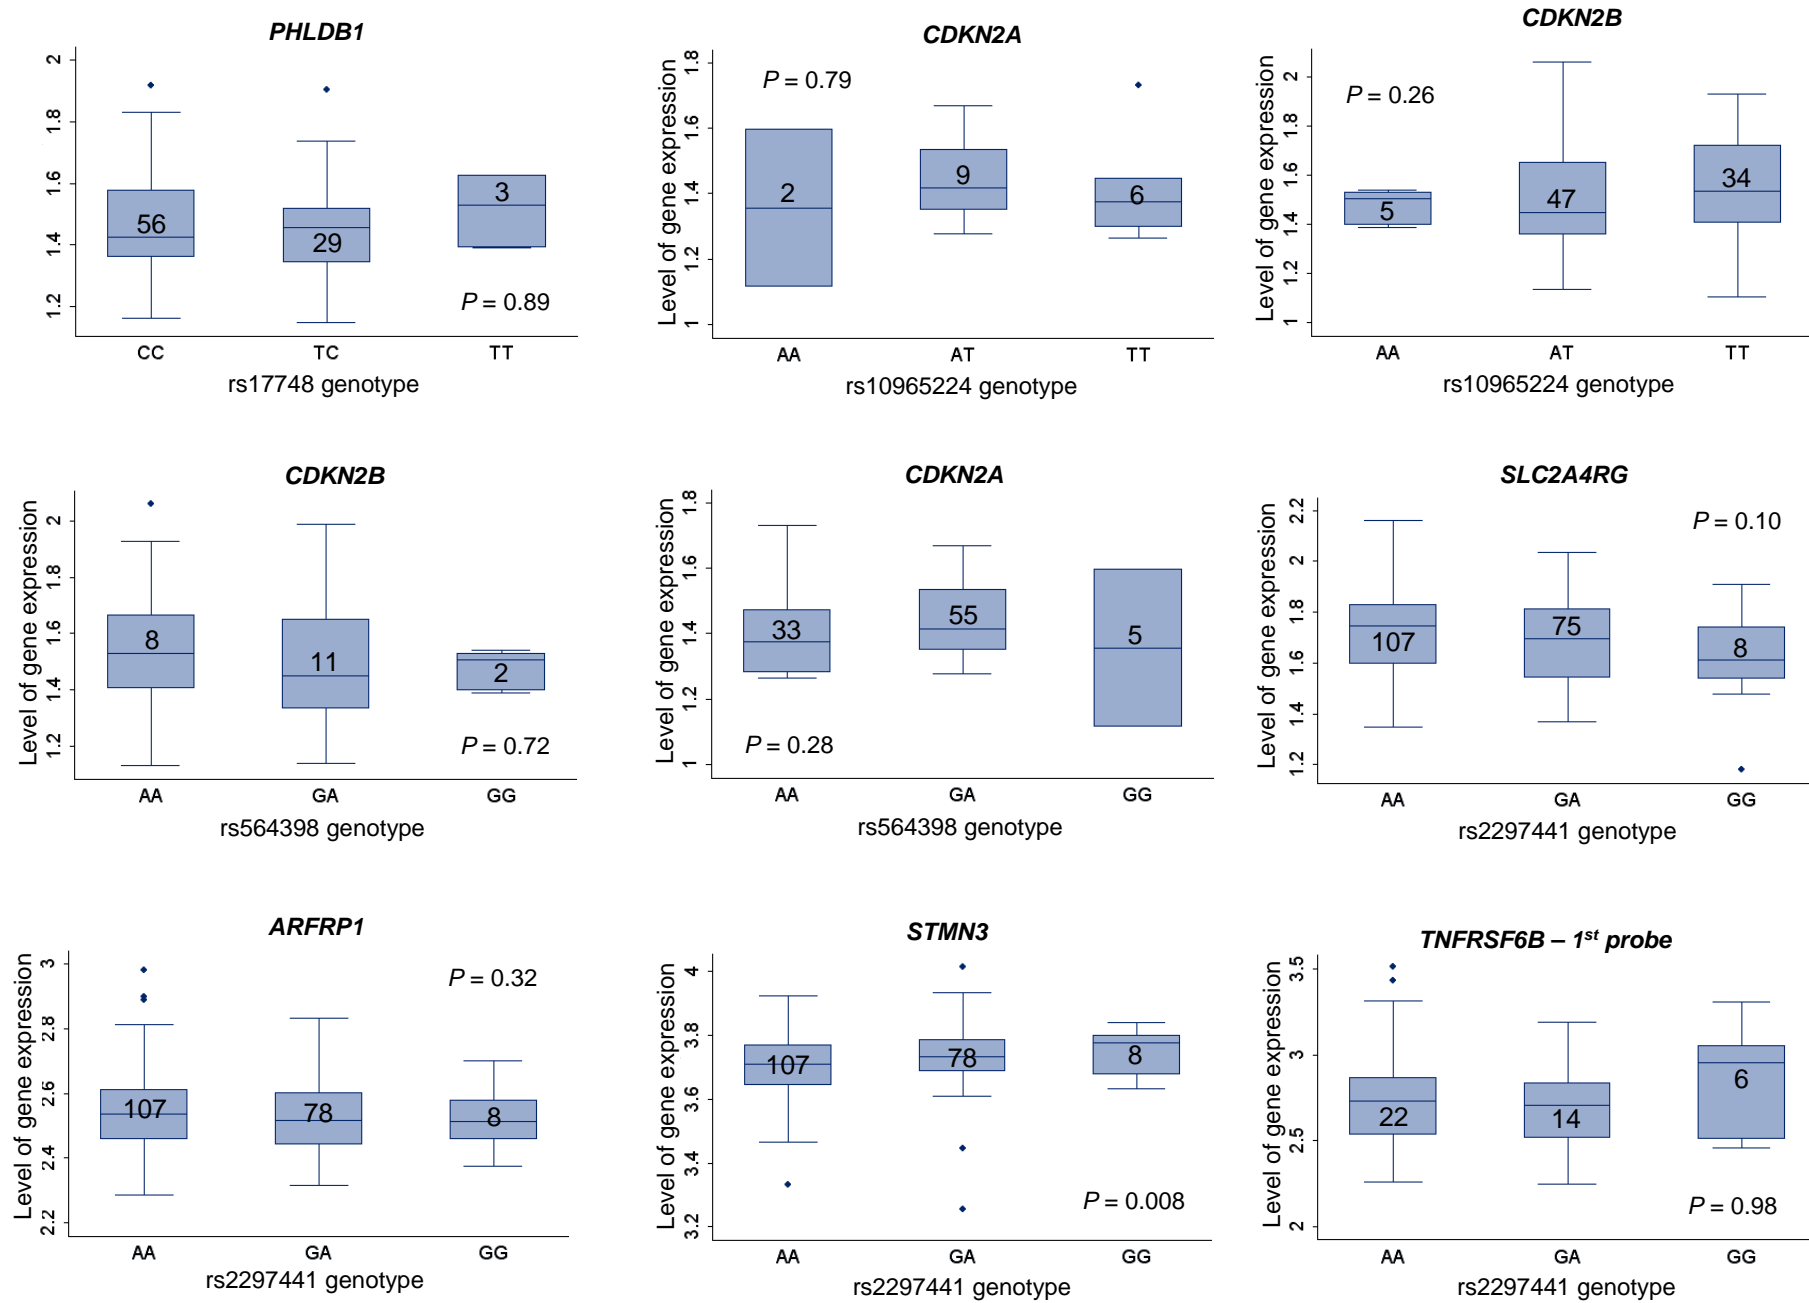



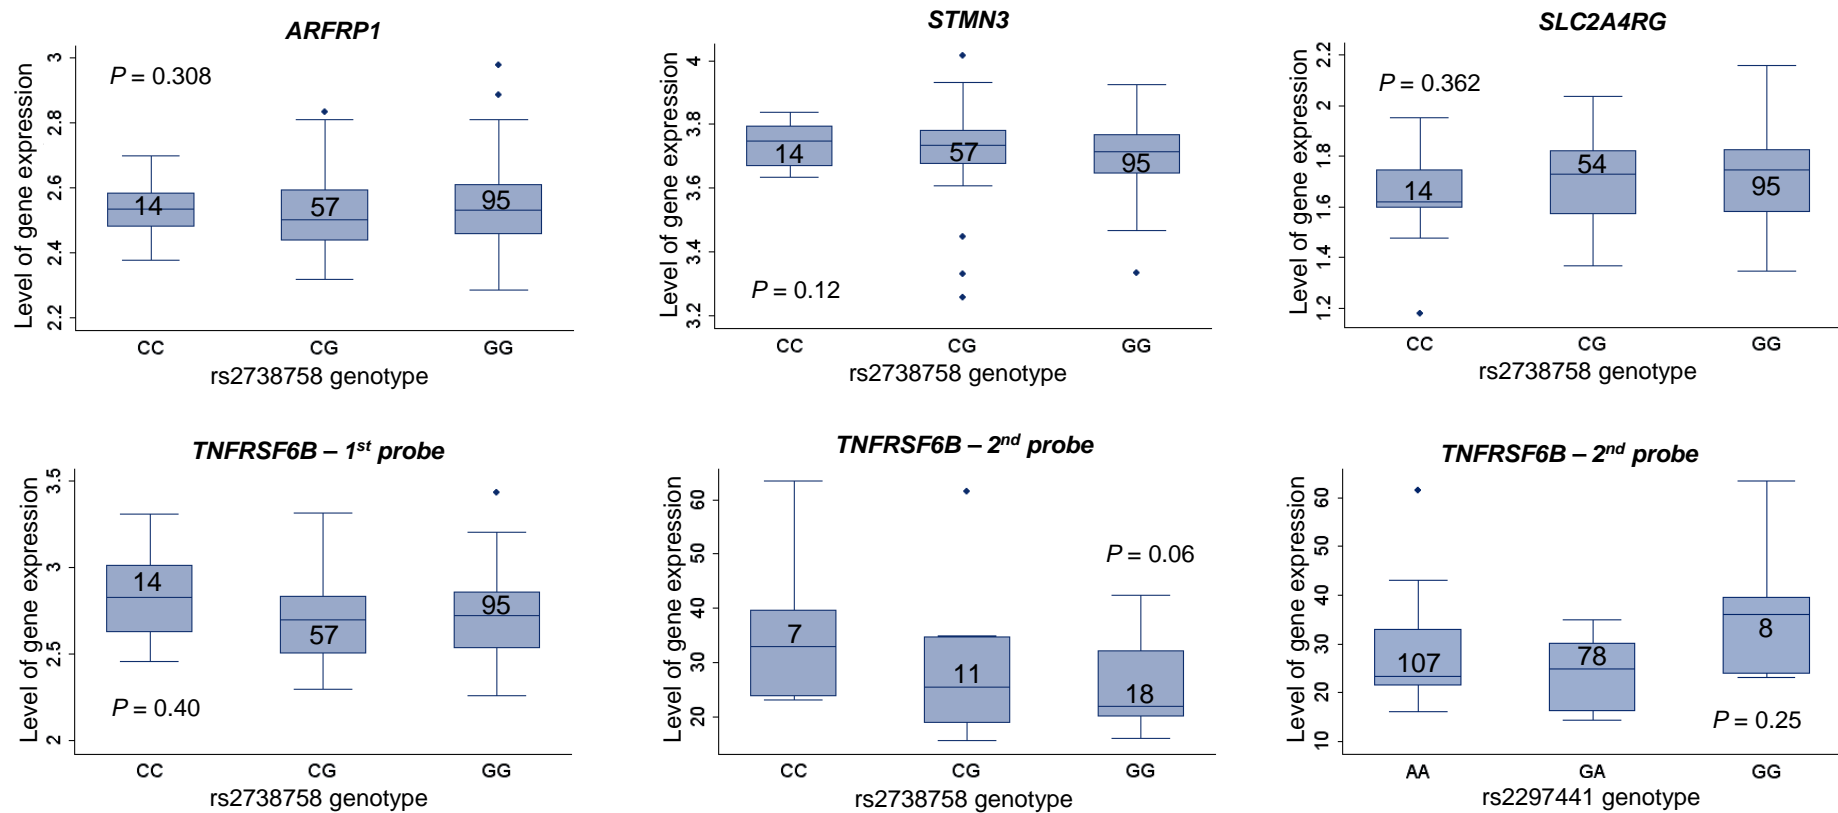

**Supplementary Figure 2b: Relationship between (a) lymphocyte and (b) normal cortical mRNA expression levels of *PHLDB1* and rs17748 genotype, *CDKN2A/CDKN2B* and rs10965224/rs564398/rs1063192/rs2157719/rs1412829/rs49777656 genotype, *ARFRP1/STMN3/SLC2A4RG/TNFRSF6B* and rs2297441/rs2738758/rs2297440/rs6010620 genotype and *TERT* and rs2736100 genotype.** Expression of *PHLDB1*, *CDKN2A*, *CDKN2B*, *ARFRP1*, *STMN3*, *SLC2A4RG* and *TNFRSF6B* in lymphocytes based on expression data from analysis of 90 Epstein-Barr virus-transformed lymphoblastoid cell lines using Sentrix Human-6 Expression BeadChip (Illumina, San Diego, USA)<sup>24,25</sup>. Expression of *PHLDB1*, *CDKN2A*, *CDKN2B*, *ARFRP1*, *STMN3*, *SLC2A4RG* and *TNFRSF6B* in normal human cortex based on expression data from analysis of 193 normal human brain samples using Affymetrix GeneChip Human Mapping 500K Arrays and Illumina HumanRefseq-8 Expression BeadChip platforms<sup>26</sup>. Expression and/or genotype information was not available for every sample and thus the total number of samples may be <193. Where SNPs genotyped in our study were not typed HAPMAP data was used to identify correlated SNPs in high LD ( $r^2 > 0.8$ ). The number of samples with each genotype is given for each plot. Combining the lowest frequency homozygote with the heterozygote and re-performing the statistical test produced no further significant results. Differences in the distribution of expression by SNP genotype were compared using a Wilcoxon-type test for trend.

| SNP        | Chr | Gene        | Location (bp) | Ancestral allele frequency | Risk allele | GWA studies |             |                        | Replication studies |              |                        | Combined results |             |                        |                  |
|------------|-----|-------------|---------------|----------------------------|-------------|-------------|-------------|------------------------|---------------------|--------------|------------------------|------------------|-------------|------------------------|------------------|
|            |     |             |               |                            |             | OR          | 95% CI      | P                      | OR                  | 95% CI       | P                      | OR               | 95% CI      | P                      | P <sub>het</sub> |
| rs2736100  | 5   | TERT        | 1,339,516     | 0.51                       | G           | 1.20        | 1.1 - 1.33  | 2.21x10 <sup>-6</sup>  | 1.33                | 1.20 - 1.49  | 2.87x10 <sup>-13</sup> | 1.27             | 1.19 - 1.37 | 1.50x10 <sup>-17</sup> | 0.18             |
| rs2853676  | 5   | TERT        | 1,341,547     | 0.27                       | A           | 1.22        | 1.14 - 1.31 | 5.30x10 <sup>-6</sup>  | 1.30                | 1.21 - 1.38  | 1.06x10 <sup>-9</sup>  | 1.26             | 1.2 - 1.32  | 4.21x10 <sup>-14</sup> | 0.67             |
| rs10464870 | 8   | CCDC26      | 130,547,005   | 0.21                       | C           | 1.24        | 1.15 - 1.34 | 3.9x10 <sup>-6</sup>   | 1.22                | 1.13 - 1.31  | 1.77x10 <sup>-5</sup>  | 1.23             | 1.17 - 1.3  | 3.04x10 <sup>-10</sup> | 0.05             |
| rs891835   | 8   | CCDC26      | 130,560,934   | 0.22                       | T           | 1.24        | 1.15 - 1.33 | 3.92x10 <sup>-6</sup>  | 1.24                | 1.15 - 1.33  | 4.43x10 <sup>-6</sup>  | 1.24             | 1.17 - 1.3  | 7.54x10 <sup>-11</sup> | 0.01             |
| rs6470745  | 8   | CCDC26      | 130,711,103   | 0.20                       | G           | 1.30        | 1.2 - 1.39  | 5.79x10 <sup>-6</sup>  | 1.31                | 1.22 - 1.41  | 9.09x10 <sup>-9</sup>  | 1.30             | 1.24 - 1.37 | 2.77x10 <sup>-15</sup> | 0.01             |
| rs16904140 | 8   | CCDC26      | 130,734,825   | 0.21                       | A           | 1.25        | 1.16 - 1.35 | 1.41x10 <sup>-6</sup>  | 1.28                | 1.19 - 1.37  | 1.14x10 <sup>-7</sup>  | 1.27             | 1.2 - 1.33  | 7.88x10 <sup>-13</sup> | 0.01             |
| rs4295627  | 8   | CCDC26      | 130,754,639   | 0.17                       | G           | 1.33        | 1.23 - 1.42 | 1.47x10 <sup>-8</sup>  | 1.39                | 1.3 - 1.49   | 2.20x10 <sup>-11</sup> | 1.36             | 1.29 - 1.43 | 2.34x10 <sup>-18</sup> | 0.01             |
| rs1063192  | 9   | CDKN2A/B    | 21,993,367    | 0.44                       | C           | 1.21        | 1.13 - 1.29 | 1.44x10 <sup>-6</sup>  | 1.21                | 1.14 - 1.29  | 6.96x10 <sup>-7</sup>  | 1.21             | 1.16 - 1.27 | 4.61x10 <sup>-12</sup> | 0.81             |
| rs2157719  | 9   | CDKN2A/B    | 22,023,366    | 0.57                       | G           | 1.22        | 1.11 - 1.35 | 6.80x10 <sup>-7</sup>  | 1.22                | 1.11 - 1.33  | 4.42x10 <sup>-7</sup>  | 1.22             | 1.14 - 1.3  | 1.41x10 <sup>-12</sup> | 0.68             |
| rs1412829  | 9   | CDKN2A/B    | 22,033,926    | 0.42                       | C           | 1.22        | 1.14 - 1.3  | 7.23x10 <sup>-7</sup>  | 1.23                | 1.15 - 1.3   | 1.80x10 <sup>-7</sup>  | 1.22             | 1.17 - 1.28 | 6.23x10 <sup>-13</sup> | 0.67             |
| rs4977756  | 9   | CDKN2A/B    | 22,058,652    | 0.40                       | G           | 1.25        | 1.17 - 1.32 | 2.39x10 <sup>-9</sup>  | 1.24                | 1.16 - 1.31  | 5.90x10 <sup>-8</sup>  | 1.24             | 1.19 - 1.3  | 7.24x10 <sup>-15</sup> | 0.94             |
| rs498872   | 11  | PHLDB1      | 117,982,577   | 0.31                       | T           | 1.26        | 1.17 - 1.34 | 1.03x10 <sup>-7</sup>  | 1.12                | 1.04 - 1.2   | 4.56x10 <sup>-3</sup>  | 1.18             | 1.13 - 1.24 | 1.07x10 <sup>-8</sup>  | 0.04             |
| rs6010620  | 20  | RTEL1       | 61,780,283    | 0.23                       | G           | 1.28        | 1.18 - 1.38 | 8.38x10 <sup>-7</sup>  | 1.28                | 1.18 - 1.38  | 6.49x10 <sup>-7</sup>  | 1.28             | 1.21 - 1.35 | 2.52x10 <sup>-12</sup> | 0.38             |
| rs2297440  | 20  | RTEL1       | 61,782,743    | 0.22                       | C           | 1.28        | 1.18 - 1.38 | 1.01x10 <sup>-6</sup>  | 1.26                | 1.16 - 1.35  | 4.44x10 <sup>-6</sup>  | 1.27             | 1.2 - 1.34  | 2.06x10 <sup>-11</sup> | 0.4              |
| rs7124728  | 11  |             | 70,554,083    | 0.66                       | C           | 1.38        | 1.3 - 1.47  | 2.28x10 <sup>-13</sup> | 1.05                | 0.97 - 1.13  | 0.02                   | 1.18             | 1.13 - 1.24 | 8.18x10 <sup>-9</sup>  | <0.01            |
| rs7300686  | 12  |             | 127,113,162   | 0.49                       | C           | 1.29        | 1.22 - 1.37 | 5.28x10 <sup>-11</sup> | 1.02*               | 0.91 - 1.12* | 0.76*                  | 1.17             | 1.11 - 1.23 | 5.72x10 <sup>-7</sup>  | 0.01             |
| rs17748    | 11  | TREH,PHLDB1 | 118,033,634   | 0.77                       | T           | 1.25        | 1.16 - 1.34 | 2.36x10 <sup>-6</sup>  | 1.13                | 1.04 - 1.21  | 7.46x10 <sup>-3</sup>  | 1.18             | 1.12 - 1.25 | 2.14x10 <sup>-7</sup>  | 0.06             |
| rs9656979  | 8   | CCDC26      | 130,733,589   | 0.57                       | C           | 1.20        | 1.12 - 1.28 | 5.59x10 <sup>-6</sup>  | 1.12^               | 1.01 - 1.23^ | 0.04^                  | 1.17             | 1.11 - 1.24 | 1.08x10 <sup>-6</sup>  | 0.01             |
| rs9369226  | 6   |             | 40,778,694    | 0.19                       | A           | 1.22        | 1.09 - 1.39 | 9.17x10 <sup>-5</sup>  | 1.14                | 1.02 - 1.26  | 0.01                   | 1.18             | 1.09 - 1.28 | 4.08x10 <sup>-6</sup>  | <0.01            |
| rs171125   | 16  |             | 34,618,468    | 0.91                       | A           | 1.37        | 1.24 - 1.51 | 2.48x10 <sup>-6</sup>  | 1.11                | 0.99 - 1.24  | 0.09                   | 1.23             | 1.14 - 1.32 | 8.10x10 <sup>-6</sup>  | 0.33             |
| rs6931798  | 6   |             | 40,773,393    | 0.82                       | T           | 1.21        | 1.11 - 1.31 | 1.25x10 <sup>-5</sup>  | 1.10                | 1.0 - 1.2    | 0.05                   | 1.15             | 1.09 - 1.22 | 4.66x10 <sup>-5</sup>  | <0.01            |
| rs6869535  | 5   |             | 40,633,375    | 0.82                       | G           | 1.29        | 1.18 - 1.4  | 4.81x10 <sup>-6</sup>  | 1.06                | 0.96 - 1.16  | 0.26                   | 1.16             | 1.09 - 1.24 | 7.73x10 <sup>-5</sup>  | 0.28             |
| rs2110922  | 2   | SLC8A1      | 40,217,148    | 0.36                       | T           | 1.20        | 1.10 - 1.33 | 9.33x10 <sup>-6</sup>  | 1.04                | 0.96 - 1.14  | 0.30                   | 1.12             | 1.05 - 1.19 | 1.24x10 <sup>-4</sup>  | 0.38             |
| rs2072532  | 2   | SLC8A1      | 40,219,805    | 0.52                       | T           | 1.19        | 1.11 - 1.27 | 1.31x10 <sup>-5</sup>  | 1.03                | 0.96 - 1.11  | 0.42                   | 1.11             | 1.05 - 1.16 | 3.02x10 <sup>-4</sup>  | <0.01            |
| rs7257116  | 19  | MKNK2       | 1,979,985     | 0.60                       | C           | 1.19        | 1.11 - 1.27 | 4.12x10 <sup>-5</sup>  | 1.03^               | 0.92 - 1.14^ | 0.62^                  | 1.13             | 1.07 - 1.2  | 2.80x10 <sup>-4</sup>  | <0.01            |
| rs1509937  | 10  |             | 66,725,911    | 0.67                       | G           | 1.23        | 1.15 - 1.31 | 8.22x10 <sup>-7</sup>  | 0.99                | 0.91 - 1.07  | 0.84                   | 1.10             | 1.04 - 1.16 | 1.04x10 <sup>-3</sup>  | 0.19             |
| rs2206920  | 20  |             | 6,616,179     | 0.91                       | A           | 1.34        | 1.21 - 1.47 | 1.18x10 <sup>-5</sup>  | 1.01                | 0.88 - 1.14  | 0.90                   | 1.16             | 1.07 - 1.25 | 1.41x10 <sup>-3</sup>  | <0.01            |
| rs12531711 | 7   | IRF5, TNPO3 | 128,404,702   | 0.89                       | G           | 1.36        | 1.23 - 1.48 | 9.91x10 <sup>-7</sup>  | 0.98                | 0.86 - 1.1   | 0.74                   | 1.15             | 1.06 - 1.24 | 1.41x10 <sup>-3</sup>  | <0.01            |
| rs10488631 | 7   | IRF5, TNPO3 | 128,381,419   | 0.89                       | C           | 1.37        | 1.25 - 1.49 | 4.94x10 <sup>-7</sup>  | 0.97                | 0.85 - 1.09  | 0.59                   | 1.15             | 1.06 - 1.23 | 1.62x10 <sup>-3</sup>  | 0.33             |
| rs10924559 | 1   |             | 244,445,616   | 0.86                       | G           | 1.29        | 1.18 - 1.4  | 7.47x10 <sup>-6</sup>  | 1.00                | 0.9 - 1.11   | 0.93                   | 1.13             | 1.05 - 1.21 | 1.83x10 <sup>-3</sup>  | <0.01            |
| rs1384847  | 4   |             | 53,370,591    | 0.91                       | G           | 1.40        | 1.25 - 1.56 | 1.07x10 <sup>-5</sup>  | 0.98                | 0.85 - 1.12  | 0.82                   | 1.15             | 1.05 - 1.25 | 5.62x10 <sup>-3</sup>  | <0.01            |
| rs1941114  | 18  | CHST9       | 22,868,217    | 0.15                       | G           | 1.35        | 1.16 - 1.59 | 4.59x10 <sup>-7</sup>  | 1.05                | 0.94 - 1.15  | 0.38                   | 1.12             | 0.82 - 0.97 | 5.64x10 <sup>-3</sup>  | <0.01            |

|           |    |                |             |      |   |      |             |                       |      |             |                       |      |             |      |       |
|-----------|----|----------------|-------------|------|---|------|-------------|-----------------------|------|-------------|-----------------------|------|-------------|------|-------|
| rs7325443 | 13 | <i>ARHGEF7</i> | 110,688,557 | 0.81 | T | 1.22 | 1.12 - 1.32 | 8.02x10 <sup>-5</sup> | 0.97 | 0.88 - 1.07 | 0.56                  | 1.08 | 1.01 - 1.15 | 0.02 | <0.01 |
| rs7325927 | 13 |                | 107,273,514 | 0.26 | T | 1.23 | 1.11 - 1.39 | 2.53x10 <sup>-6</sup> | 0.88 | 0.81 - 0.95 | 4.76x10 <sup>-3</sup> | 1.04 | 0.9 - 1.02  | 0.17 | <0.01 |

\* Only French data in replication studies

^ Only Swedish and German data in replication studies

| SNP        | Chr | French case genotypes |    |     |    |      |    | French control genotypes |    |     |    |      |    | French results |             |                        |
|------------|-----|-----------------------|----|-----|----|------|----|--------------------------|----|-----|----|------|----|----------------|-------------|------------------------|
|            |     |                       |    |     |    |      |    |                          |    |     |    |      |    | OR             | 95% CI      | P                      |
| rs2736100  | 5   | 225                   | TT | 686 | TG | 441  | GG | 383                      | TT | 807 | TG | 371  | GG | 1.43           | 1.23 - 1.67 | 1.08x10 <sup>-10</sup> |
| rs2853676  | 5   | 164                   | AA | 623 | AG | 574  | GG | 127                      | AA | 622 | AG | 741  | GG | 1.29           | 1.18 - 1.4  | 7.71x10 <sup>-6</sup>  |
| rs10464870 | 8   | 822                   | TT | 460 | TC | 78   | CC | 1071                     | TT | 452 | TC | 65   | CC | 1.29           | 1.17 - 1.42 | 6.04x10 <sup>-5</sup>  |
| rs891835   | 8   | 820                   | TT | 457 | TG | 85   | GG | 955                      | TT | 442 | TG | 55   | GG | 1.26           | 1.14 - 1.39 | 2.93x10 <sup>-3</sup>  |
| rs6470745  | 8   | 839                   | AA | 455 | AG | 86   | GG | 1066                     | AA | 479 | AG | 41   | GG | 1.36           | 1.24 - 1.49 | 1.84x10 <sup>-6</sup>  |
| rs16904140 | 8   | 97                    | AA | 466 | AG | 812  | GG | 44                       | AA | 519 | AG | 1020 | GG | 1.33           | 1.2 - 1.45  | 7.63x10 <sup>-6</sup>  |
| rs4295627  | 8   | 885                   | TT | 418 | TG | 71   | GG | 1133                     | TT | 421 | TG | 25   | GG | 1.46           | 1.32 - 1.59 | 5.13x10 <sup>-8</sup>  |
| rs1063192  | 9   | 443                   | TT | 649 | TC | 275  | CC | 573                      | TT | 743 | TC | 250  | CC | 1.18           | 1.08 - 1.29 | 0.0014                 |
| rs2157719  | 9   | 458                   | AA | 638 | AG | 271  | GG | 589                      | AA | 735 | AG | 253  | GG | 1.16           | 1.04 - 1.32 | 0.0036                 |
| rs1412829  | 9   | 469                   | TT | 643 | TC | 248  | CC | 607                      | TT | 741 | TC | 228  | CC | 1.17           | 1.07 - 1.28 | 0.0026                 |
| rs4977756  | 9   | 474                   | AA | 639 | AG | 239  | GG | 651                      | AA | 723 | AG | 209  | GG | 1.24           | 1.14 - 1.35 | 4.35x10 <sup>-5</sup>  |
| rs498872   | 11  | 184                   | TT | 627 | TC | 562  | CC | 170                      | TT | 668 | TC | 735  | CC | 1.20           | 1.09 - 1.31 | 8.05x10 <sup>-4</sup>  |
| rs6010620  | 20  | 34                    | AA | 386 | AG | 912  | GG | 59                       | AA | 508 | AG | 978  | GG | 1.24           | 1.11 - 1.38 | 0.0017                 |
| rs2297440  | 20  | 32                    | TT | 387 | TC | 910  | CC | 52                       | TT | 478 | TC | 930  | CC | 1.23           | 1.09 - 1.36 | 0.0040                 |
| rs7124728  | 11  | 267                   | TT | 661 | TC | 413  | CC | 319                      | TT | 759 | TC | 470  | CC | 1.02           | 0.92 - 1.13 | 0.6669                 |
| rs7300686  | 12  | 340                   | TT | 654 | TC | 365  | CC | 363                      | TT | 739 | TC | 387  | CC | 1.00           | 0.9 - 1.1   | 0.7680                 |
| rs17748    | 11  | 112                   | TT | 546 | TC | 717  | CC | 98                       | TT | 554 | TC | 929  | CC | 1.24           | 1.13 - 1.36 | 2.14x10 <sup>-4</sup>  |
| rs9369226  | 6   | 84                    | AA | 484 | AG | 803  | GG | 65                       | AA | 518 | AG | 962  | GG | 1.18           | 0.73 - 0.97 | 0.0105                 |
| rs171125   | 16  | 13                    | AA | 271 | AG | 1089 | GG | 19                       | AA | 301 | AG | 1221 | GG | 0.98           | 0.82 - 1.15 | 0.8216                 |
| rs6931798  | 6   | 63                    | TT | 462 | TC | 811  | CC | 60                       | TT | 494 | TC | 925  | CC | 1.08           | 0.95 - 1.21 | 0.2510                 |
| rs6869535  | 5   | 27                    | AA | 371 | AG | 956  | GG | 34                       | AA | 468 | AG | 1083 | GG | 1.10           | 0.96 - 1.24 | 0.1996                 |
| rs2110922  | 2   | 161                   | TT | 661 | TG | 549  | GG | 185                      | TT | 714 | TG | 628  | GG | 1.02           | 0.87 - 1.09 | 0.7742                 |
| rs2072532  | 2   | 371                   | TT | 714 | TC | 286  | CC | 424                      | TT | 804 | TC | 339  | CC | 1.02           | 0.91 - 1.12 | 0.7621                 |
| rs1509937  | 10  | 619                   | AA | 595 | AG | 146  | GG | 735                      | AA | 675 | AG | 166  | GG | 1.03           | 0.92 - 1.14 | 0.5901                 |
| rs2206920  | 20  | 12                    | AA | 231 | AG | 1133 | GG | 16                       | AA | 278 | AG | 1238 | GG | 0.91           | 0.73 - 1.08 | 0.2743                 |
| rs12531711 | 7   | 1110                  | AA | 252 | AG | 15   | GG | 1273                     | AA | 298 | AG | 14   | GG | 1.00           | 0.83 - 1.16 | 0.9552                 |
| rs10488631 | 7   | 1107                  | TT | 255 | TC | 14   | CC | 1278                     | TT | 294 | TC | 15   | CC | 1.01           | 0.84 - 1.18 | 0.9236                 |
| rs10924559 | 1   | 32                    | AA | 341 | AG | 993  | GG | 34                       | AA | 407 | AG | 1120 | GG | 0.97           | 0.83 - 1.17 | 0.6767                 |

|           |    |    |    |     |    |      |    |    |    |     |    |      |    |      |             |        |
|-----------|----|----|----|-----|----|------|----|----|----|-----|----|------|----|------|-------------|--------|
| rs1384847 | 4  | 9  | AA | 172 | AG | 1190 | GG | 5  | AA | 211 | AG | 1331 | GG | 1.03 | 0.83 - 1.23 | 0.7500 |
| rs1941114 | 18 | 27 | AA | 359 | AG | 977  | GG | 31 | AA | 384 | AG | 1169 | GG | 0.92 | 0.85 - 1.24 | 0.2420 |
| rs7325443 | 13 | 53 | TT | 443 | TC | 884  | CC | 72 | TT | 489 | TC | 1023 | CC | 0.99 | 0.87 - 1.12 | 0.9317 |
| rs7325927 | 13 | 96 | TT | 527 | TC | 751  | CC | 89 | TT | 611 | TC | 632  | CC | 0.83 | 0.75 - 0.94 | 0.0038 |

| SNP        | Chr | German case genotypes |    |     |    |     |    | German control genotypes |    |     |    |     |    | German results |             |                       |
|------------|-----|-----------------------|----|-----|----|-----|----|--------------------------|----|-----|----|-----|----|----------------|-------------|-----------------------|
|            |     |                       |    |     |    |     |    |                          |    |     |    |     |    | OR             | 95% CI      | P                     |
| rs2736100  | 5   | 91                    | TT | 240 | TG | 160 | GG | 133                      | TT | 269 | TG | 163 | GG | 1.19           | 1.02 - 3.49 | 0.0473                |
| rs2853676  | 5   | 52                    | AA | 217 | AG | 229 | GG | 45                       | AA | 209 | AG | 311 | GG | 1.31           | 1.13 - 3.27 | 0.0041                |
| rs10464870 | 8   | 276                   | TT | 180 | TC | 42  | CC | 360                      | TT | 182 | TC | 23  | CC | 1.41           | 1.21 - 3.37 | 7.68x10 <sup>-4</sup> |
| rs891835   | 8   | 258                   | TT | 191 | TG | 52  | GG | 354                      | TT | 195 | TG | 19  | GG | 1.60           | 1.4 - 3.56  | 3.07x10 <sup>-6</sup> |
| rs6470745  | 8   | 273                   | AA | 196 | AG | 33  | GG | 392                      | AA | 159 | AG | 17  | GG | 1.73           | 1.52 - 3.69 | 4.33x10 <sup>-7</sup> |
| rs16904140 | 8   | 39                    | AA | 198 | AG | 263 | GG | 19                       | AA | 173 | AG | 376 | GG | 1.67           | 1.46 - 3.63 | 1.08x10 <sup>-6</sup> |
| rs4295627  | 8   | 283                   | TT | 185 | TG | 30  | GG | 414                      | TT | 144 | TG | 13  | GG | 1.86           | 1.64 - 3.82 | 3.17x10 <sup>-8</sup> |
| rs1063192  | 9   | 136                   | TT | 243 | TC | 112 | CC | 191                      | TT | 279 | TC | 99  | CC | 1.26           | 1.08 - 3.22 | 0.0094                |
| rs2157719  | 9   | 136                   | AA | 253 | AG | 111 | GG | 198                      | AA | 266 | AG | 101 | GG | 1.28           | 1.09 - 3.22 | 0.0052                |
| rs1412829  | 9   | 147                   | TT | 245 | TC | 111 | CC | 203                      | TT | 272 | TC | 94  | CC | 1.27           | 1.1 - 3.23  | 0.0056                |
| rs4977756  | 9   | 151                   | AA | 240 | AG | 108 | GG | 211                      | AA | 265 | AG | 90  | GG | 1.29           | 1.12 - 3.25 | 0.0034                |
| rs498872   | 11  | 39                    | TT | 214 | TC | 238 | CC | 55                       | TT | 250 | TC | 264 | CC | 1.10           | 0.72 - 2.87 | 0.3381                |
| rs6010620  | 20  | 16                    | AA | 147 | AG | 336 | GG | 28                       | AA | 177 | AG | 352 | GG | 1.21           | 0.99 - 3.17 | 0.0885                |
| rs2297440  | 20  | 19                    | TT | 147 | TC | 334 | CC | 28                       | TT | 180 | TC | 358 | CC | 1.16           | 0.94 - 3.12 | 0.1814                |
| rs7124728  | 11  | 100                   | TT | 240 | TC | 161 | CC | 117                      | TT | 281 | TC | 169 | CC | 1.06           | 0.89 - 3.02 | 0.4888                |
| rs17748    | 11  | 16                    | TT | 195 | TC | 292 | CC | 34                       | TT | 215 | TC | 320 | CC | 0.87           | 0.67 - 2.83 | 0.1988                |
| rs9656979  | 8   | 153                   | TT | 235 | TC | 106 | CC | 194                      | TT | 280 | TC | 89  | CC | 1.20           | 1.03 - 3.16 | 0.0349                |
| rs9369226  | 6   | 15                    | AA | 158 | AG | 321 | GG | 18                       | AA | 168 | AG | 381 | GG | 1.08           | 0.71 - 2.89 | 0.5344                |
| rs171125   | 16  | 7                     | AA | 88  | AG | 401 | GG | 4                        | AA | 96  | AG | 467 | GG | 1.13           | 0.85 - 3.09 | 0.3905                |
| rs6931798  | 6   | 18                    | TT | 160 | TC | 323 | CC | 16                       | TT | 164 | TC | 390 | CC | 1.17           | 0.95 - 3.13 | 0.1553                |
| rs6869535  | 5   | 18                    | AA | 134 | AG | 326 | GG | 13                       | AA | 191 | AG | 364 | GG | 1.09           | 0.87 - 3.05 | 0.4318                |
| rs2110922  | 2   | 67                    | TT | 254 | TG | 183 | GG | 77                       | TT | 267 | TG | 222 | GG | 1.06           | 0.77 - 2.9  | 0.5281                |
| rs2072532  | 2   | 153                   | TT | 227 | TC | 112 | CC | 146                      | TT | 274 | TC | 132 | CC | 1.12           | 0.95 - 3.08 | 0.1939                |
| rs7257116  | 19  | 74                    | TT | 246 | TC | 184 | CC | 87                       | TT | 271 | TC | 211 | CC | 1.00           | 0.83 - 2.96 | 0.9938                |
| rs1509937  | 10  | 214                   | AA | 222 | AG | 66  | GG | 226                      | AA | 258 | AG | 67  | GG | 0.99           | 0.81 - 2.95 | 0.8811                |
| rs2206920  | 20  | 4                     | AA | 85  | AG | 411 | GG | 3                        | AA | 96  | AG | 467 | GG | 1.04           | 0.74 - 3    | 0.8151                |
| rs12531711 | 7   | 410                   | AA | 85  | AG | 6   | GG | 456                      | AA | 96  | AG | 10  | GG | 0.93           | 0.66 - 2.89 | 0.6333                |
| rs10488631 | 7   | 400                   | TT | 79  | TC | 4   | CC | 460                      | TT | 98  | TC | 10  | CC | 0.86           | 0.57 - 2.82 | 0.2982                |
| rs10924559 | 1   | 10                    | AA | 110 | AG | 372 | GG | 14                       | AA | 136 | AG | 412 | GG | 0.89           | 0.67 - 3.08 | 0.3686                |

|           |    |    |    |     |    |     |    |    |    |     |    |     |    |      |             |        |
|-----------|----|----|----|-----|----|-----|----|----|----|-----|----|-----|----|------|-------------|--------|
| rs1384847 | 4  | 2  | AA | 89  | AG | 409 | GG | 6  | AA | 100 | AG | 462 | GG | 1.07 | 0.78 - 3.03 | 0.6854 |
| rs1941114 | 18 | 12 | AA | 127 | AG | 361 | GG | 12 | AA | 160 | AG | 397 | GG | 1.09 | 0.68 - 2.88 | 0.4942 |
| rs7325443 | 13 | 16 | TT | 139 | TC | 346 | CC | 27 | TT | 168 | TC | 376 | CC | 0.86 | 0.64 - 2.82 | 0.1657 |
| rs7325927 | 13 | 24 | TT | 219 | TC | 261 | CC | 40 | TT | 227 | TC | 301 | CC | 0.97 | 0.63 - 2.99 | 0.7726 |

| SNP        | Chr | Sweden case genotypes |    |     |    |     |    | Sweden control genotypes |    |     |    |     |    | Sweden results |             |                       |
|------------|-----|-----------------------|----|-----|----|-----|----|--------------------------|----|-----|----|-----|----|----------------|-------------|-----------------------|
|            |     |                       |    |     |    |     |    |                          |    |     |    |     |    | OR             | 95% CI      | P                     |
| rs2736100  | 5   | 120                   | TT | 326 | TG | 177 | GG | 212                      | TT | 367 | TG | 185 | GG | 1.30           | 1.19 - 3.04 | 9.19x10 <sup>-4</sup> |
| rs2853676  | 5   | 51                    | AA | 264 | AG | 324 | GG | 45                       | AA | 269 | AG | 446 | GG | 1.30           | 1.13 - 3.26 | 0.0027                |
| rs10464870 | 8   | 379                   | TT | 210 | TC | 34  | CC | 448                      | TT | 281 | TC | 34  | CC | 0.97           | 0.79 - 2.93 | 0.7249                |
| rs891835   | 8   | 372                   | TT | 226 | TG | 42  | GG | 426                      | TT | 290 | TG | 42  | GG | 0.98           | 0.8 - 2.94  | 0.7822                |
| rs6470745  | 8   | 386                   | AA | 224 | AG | 31  | GG | 468                      | AA | 258 | AG | 41  | GG | 1.01           | 0.83 - 2.97 | 0.9271                |
| rs16904140 | 8   | 36                    | AA | 225 | AG | 377 | GG | 52                       | AA | 258 | AG | 458 | GG | 0.98           | 0.81 - 2.94 | 0.8586                |
| rs4295627  | 8   | 393                   | TT | 223 | TG | 27  | GG | 492                      | TT | 247 | TG | 36  | GG | 1.06           | 0.88 - 3.02 | 0.5330                |
| rs1063192  | 9   | 114                   | TT | 331 | TC | 175 | CC | 199                      | TT | 374 | TC | 191 | CC | 1.25           | 1.1 - 3.21  | 0.0041                |
| rs2157719  | 9   | 129                   | AA | 325 | AG | 187 | GG | 210                      | AA | 380 | AG | 184 | GG | 1.28           | 1.12 - 3.23 | 0.0011                |
| rs1412829  | 9   | 130                   | TT | 333 | TC | 179 | CC | 218                      | TT | 366 | TC | 176 | CC | 1.30           | 1.15 - 3.26 | 5.47x10 <sup>-4</sup> |
| rs4977756  | 9   | 150                   | AA | 325 | AG | 157 | GG | 223                      | AA | 379 | AG | 168 | GG | 1.18           | 1.03 - 3.14 | 0.0294                |
| rs498872   | 11  | 78                    | TT | 287 | TC | 278 | CC | 83                       | TT | 323 | TC | 362 | CC | 1.12           | 0.97 - 3.08 | 0.1465                |
| rs6010620  | 20  | 20                    | AA | 195 | AG | 430 | GG | 54                       | AA | 264 | AG | 456 | GG | 1.40           | 1.22 - 3.36 | 2.39x10 <sup>-4</sup> |
| rs2297440  | 20  | 20                    | TT | 194 | TC | 430 | CC | 53                       | TT | 263 | TC | 457 | CC | 1.40           | 1.22 - 3.36 | 3.09x10 <sup>-4</sup> |
| rs7124728  | 11  | 101                   | TT | 305 | TC | 218 | CC | 138                      | TT | 379 | TC | 248 | CC | 1.10           | 0.94 - 3.06 | 0.2428                |
| rs17748    | 11  | 37                    | TT | 245 | TC | 362 | CC | 47                       | TT | 264 | TC | 455 | CC | 1.08           | 0.91 - 3.04 | 0.3889                |
| rs9656979  | 8   | 182                   | TT | 300 | TC | 152 | CC | 226                      | TT | 381 | TC | 164 | CC | 1.07           | 0.92 - 3.03 | 0.3879                |
| rs9369226  | 6   | 19                    | AA | 188 | AG | 433 | GG | 24                       | AA | 204 | AG | 538 | GG | 1.09           | 0.72 - 2.88 | 0.3990                |
| rs171125   | 16  | 5                     | AA | 123 | AG | 509 | GG | 6                        | AA | 97  | AG | 663 | GG | 1.52           | 1.26 - 3.48 | 0.0020                |
| rs6931798  | 6   | 21                    | TT | 183 | TC | 438 | CC | 24                       | TT | 200 | TC | 542 | CC | 1.10           | 0.9 - 3.06  | 0.3517                |
| rs6869535  | 5   | 21                    | AA | 202 | AG | 392 | GG | 28                       | AA | 229 | AG | 476 | GG | 0.97           | 0.78 - 2.93 | 0.7948                |
| rs2110922  | 2   | 93                    | TT | 325 | TG | 223 | GG | 114                      | TT | 352 | TG | 298 | GG | 1.09           | 0.77 - 2.88 | 0.2996                |
| rs2072532  | 2   | 189                   | TT | 301 | TC | 121 | CC | 242                      | TT | 356 | TC | 158 | CC | 1.00           | 0.85 - 2.96 | 0.9963                |
| rs7257116  | 19  | 81                    | TT | 316 | TC | 237 | CC | 111                      | TT | 379 | TC | 283 | CC | 1.05           | 0.9 - 3.01  | 0.5132                |
| rs1509937  | 10  | 254                   | AA | 300 | AG | 74  | GG | 312                      | AA | 339 | AG | 120 | GG | 0.92           | 0.77 - 2.88 | 0.3090                |
| rs2206920  | 20  | 7                     | AA | 110 | AG | 528 | GG | 6                        | AA | 108 | AG | 654 | GG | 1.25           | 0.99 - 3.21 | 0.0940                |
| rs12531711 | 7   | 468                   | AA | 164 | AG | 8   | GG | 558                      | AA | 194 | AG | 12  | GG | 0.98           | 0.76 - 2.94 | 0.8740                |
| rs10488631 | 7   | 465                   | TT | 162 | TC | 8   | CC | 558                      | TT | 202 | TC | 10  | CC | 0.97           | 0.75 - 2.93 | 0.7554                |
| rs10924559 | 1   | 21                    | AA | 189 | AG | 407 | GG | 25                       | AA | 201 | AG | 530 | GG | 1.15           | 0.67 - 2.83 | 0.1506                |

|           |    |    |    |     |    |     |    |    |    |     |    |     |    |      |             |        |
|-----------|----|----|----|-----|----|-----|----|----|----|-----|----|-----|----|------|-------------|--------|
| rs1384847 | 4  | 8  | AA | 132 | AG | 500 | GG | 13 | AA | 131 | AG | 623 | GG | 0.88 | 0.64 - 2.84 | 0.2673 |
| rs1941114 | 18 | 15 | AA | 174 | AG | 440 | GG | 13 | AA | 209 | AG | 543 | GG | 0.93 | 0.66 - 3.03 | 0.5292 |
| rs7325443 | 13 | 27 | TT | 210 | TC | 408 | CC | 38 | TT | 237 | TC | 498 | CC | 1.01 | 0.83 - 2.97 | 0.8867 |
| rs7325927 | 13 | 36 | TT | 240 | TC | 362 | CC | 65 | TT | 278 | TC | 431 | CC | 0.91 | 0.63 - 3.06 | 0.2558 |

| SNP        | Chr | UK case genotypes |    |     |    |     |    | UK control genotypes |    |     |    |      |    | UK results |             |                       |
|------------|-----|-------------------|----|-----|----|-----|----|----------------------|----|-----|----|------|----|------------|-------------|-----------------------|
|            |     |                   |    |     |    |     |    |                      |    |     |    |      |    | OR         | 95% CI      | P                     |
| rs2736100  | 5   | 115               | TT | 316 | TG | 200 | GG | 349                  | TT | 676 | TG | 409  | GG | 1.20       | 1.03 - 3.2  | 0.0068                |
| rs2853676  | 5   | 67                | AA | 263 | AG | 301 | GG | 113                  | AA | 596 | AG | 724  | GG | 1.14       | 1 - 3.1     | 0.0718                |
| rs10464870 | 8   | 355               | TT | 236 | TC | 40  | CC | 882                  | TT | 484 | TC | 66   | CC | 1.22       | 1.06 - 3.18 | 0.0127                |
| rs891835   | 8   | 344               | TT | 246 | TG | 41  | GG | 836                  | TT | 496 | TG | 77   | GG | 1.17       | 1.02 - 3.13 | 0.0436                |
| rs6470745  | 8   | 363               | AA | 231 | AG | 37  | GG | 921                  | AA | 448 | AG | 64   | GG | 1.26       | 1.1 - 3.22  | 0.0037                |
| rs16904140 | 8   | 46                | AA | 233 | AG | 352 | GG | 62                   | AA | 474 | AG | 896  | GG | 1.31       | 1.16 - 3.27 | 6.10x10 <sup>-4</sup> |
| rs4295627  | 8   | 386               | TT | 216 | TG | 29  | GG | 976                  | TT | 410 | TG | 48   | GG | 1.29       | 1.13 - 3.25 | 0.0023                |
| rs1063192  | 9   | 165               | TT | 298 | TC | 168 | CC | 418                  | TT | 689 | TC | 323  | CC | 1.15       | 1.02 - 3.11 | 0.0389                |
| rs2157719  | 9   | 170               | AA | 295 | AG | 166 | GG | 431                  | AA | 689 | AG | 311  | GG | 1.16       | 0.35 - 1.37 | 0.0245                |
| rs1412829  | 9   | 178               | TT | 294 | TC | 158 | CC | 450                  | TT | 686 | TC | 296  | CC | 1.16       | 1.03 - 3.12 | 0.0277                |
| rs4977756  | 9   | 189               | AA | 604 | AG | 138 | GG | 501                  | AA | 662 | AG | 270  | GG | 1.27       | 1.14 - 3.23 | 1.71x10 <sup>-4</sup> |
| rs498872   | 11  | 75                | TT | 288 | TC | 268 | CC | 119                  | TT | 634 | TC | 681  | CC | 1.22       | 1.08 - 3.18 | 0.0055                |
| rs6010620  | 20  | 26                | AA | 179 | AG | 426 | GG | 82                   | AA | 533 | AG | 818  | GG | 1.43       | 1.26 - 3.39 | 2.42x10 <sup>-5</sup> |
| rs2297440  | 20  | 24                | TT | 175 | TC | 432 | CC | 79                   | TT | 489 | TC | 818  | CC | 1.41       | 1.24 - 3.37 | 6.68x10 <sup>-5</sup> |
| rs7124728  | 11  | 45                | TT | 413 | TC | 173 | CC | 262                  | TT | 688 | TC | 454  | CC | 1.17       | 1.02 - 3.13 | 0.0369                |
| rs7300686  | 12  | 174               | TT | 238 | TC | 213 | CC | 360                  | TT | 728 | TC | 320  | CC | 1.19       | 1.06 - 3.15 | 0.0092                |
| rs17748    | 11  | 33                | TT | 252 | TC | 346 | CC | 61                   | TT | 491 | TC | 882  | CC | 1.25       | 1.09 - 3.21 | 0.0060                |
| rs9656979  | 8   | 180               | TT | 299 | TC | 152 | CC | 472                  | TT | 687 | TC | 271  | CC | 1.21       | 1.08 - 3.17 | 0.0049                |
| rs9369226  | 6   | 33                | AA | 196 | AG | 402 | GG | 48                   | AA | 441 | AG | 944  | GG | 1.14       | 1.0 - 2.84  | 0.1319                |
| rs171125   | 16  | 8                 | AA | 129 | AG | 494 | GG | 1                    | AA | 261 | AG | 1149 | GG | 1.28       | 1.06 - 3.24 | 0.0277                |
| rs6931798  | 6   | 33                | TT | 195 | TC | 403 | CC | 47                   | TT | 432 | TC | 925  | CC | 1.13       | 0.96 - 3.09 | 0.1480                |
| rs6869535  | 5   | 17                | AA | 153 | AG | 461 | GG | 37                   | AA | 430 | AG | 965  | GG | 1.23       | 1.05 - 3.19 | 0.0268                |
| rs2110922  | 2   | 99                | TT | 331 | TG | 201 | GG | 195                  | TT | 652 | TG | 573  | GG | 1.25       | 1.02 - 2.76 | 0.0014                |
| rs2072532  | 2   | 203               | TT | 314 | TC | 114 | CC | 417                  | TT | 687 | TC | 325  | CC | 1.16       | 1.02 - 3.12 | 0.0243                |
| rs7257116  | 19  | 88                | TT | 285 | TC | 258 | CC | 221                  | TT | 687 | TC | 524  | CC | 1.13       | 0.99 - 3.09 | 0.0797                |
| rs1509937  | 10  | 232               | AA | 298 | AG | 101 | GG | 645                  | AA | 653 | AG | 136  | GG | 1.39       | 1.25 - 3.35 | 4.01x10 <sup>-6</sup> |
| rs2206920  | 20  | 9                 | AA | 136 | AG | 486 | GG | 9                    | AA | 241 | AG | 1144 | GG | 1.37       | 1.15 - 3.33 | 0.0044                |
| rs12531711 | 7   | 459               | AA | 157 | AG | 15  | GG | 1168                 | AA | 249 | AG | 16   | GG | 1.59       | 1.39 - 3.55 | 4.53x10 <sup>-6</sup> |
| rs10488631 | 7   | 459               | TT | 157 | TC | 15  | CC | 1167                 | TT | 246 | TC | 16   | CC | 1.60       | 1.4 - 3.56  | 3.19x10 <sup>-6</sup> |

|            |    |    |    |     |    |     |    |    |    |     |    |      |    |      |             |        |
|------------|----|----|----|-----|----|-----|----|----|----|-----|----|------|----|------|-------------|--------|
| rs10924559 | 1  | 14 | AA | 161 | AG | 450 | GG | 21 | AA | 283 | AG | 1115 | GG | 1.37 | 1.10 - 2.69 | 0.0013 |
| rs1384847  | 4  | 2  | AA | 75  | AG | 554 | GG | 11 | AA | 226 | AG | 1197 | GG | 1.42 | 1.16 - 3.38 | 0.0092 |
| rs1941114  | 18 | 12 | AA | 133 | AG | 486 | GG | 30 | AA | 381 | AG | 1023 | GG | 1.28 | 1.07 - 2.74 | 0.0135 |
| rs7325443  | 13 | 19 | TT | 209 | TC | 403 | CC | 40 | TT | 426 | TC | 967  | CC | 1.14 | 0.97 - 3.1  | 0.1357 |
| rs7325927  | 13 | 56 | TT | 237 | TC | 336 | CC | 70 | TT | 527 | TC | 837  | CC | 1.27 | 1.06 - 2.75 | 0.0022 |

| SNP        | Chr | US case genotypes |    |     |    |     |    | US control genotypes |    |      |    |      |    | US results |             |                        |
|------------|-----|-------------------|----|-----|----|-----|----|----------------------|----|------|----|------|----|------------|-------------|------------------------|
|            |     |                   |    |     |    |     |    |                      |    |      |    |      |    | OR         | 95% CI      | P                      |
| rs2736100  | 5   | 230               | TT | 645 | TG | 372 | GG | 546                  | TT | 1103 | TG | 584  | GG | 1.22       | 1.14-2.78   | 1.01x10 <sup>-4</sup>  |
| rs2853676  | 5   | 109               | AA | 568 | AG | 570 | GG | 149                  | AA | 894  | AG | 1191 | GG | 1.28       | 1.17-3.24   | 1.35x10 <sup>-5</sup>  |
| rs10464870 | 8   | 683               | TT | 488 | TC | 76  | CC | 1370                 | TT | 761  | TC | 101  | CC | 1.26       | 1.14-3.22   | 9.62x10 <sup>-5</sup>  |
| rs891835   | 8   | 661               | TT | 498 | TG | 88  | GG | 1344                 | TT | 773  | TG | 115  | GG | 1.28       | 1.16-3.24   | 2.16x10 <sup>-6</sup>  |
| rs6470745  | 8   | 699               | AA | 469 | AG | 79  | GG | 1415                 | AA | 730  | AG | 90   | GG | 1.32       | 1.2-3.28    | 4.20x10 <sup>-6</sup>  |
| rs16904140 | 8   | 85                | AA | 476 | AG | 686 | GG | 110                  | AA | 773  | AG | 1352 | GG | 1.22       | 1.11-3.18   | 5.29x10 <sup>-4</sup>  |
| rs4295627  | 8   | 735               | TT | 451 | TG | 60  | GG | 1496                 | TT | 667  | TG | 72   | GG | 1.35       | 1.22-3.31   | 1.68x10 <sup>-6</sup>  |
| rs1063192  | 9   | 326               | TT | 602 | TC | 319 | CC | 700                  | TT | 1092 | TC | 436  | CC | 1.25       | 1.15-3.21   | 7.62x10 <sup>-6</sup>  |
| rs2157719  | 9   | 335               | AA | 601 | AG | 311 | GG | 726                  | AA | 1078 | AG | 428  | GG | 1.25       | 1.17-2.78   | 6.15x10 <sup>-6</sup>  |
| rs1412829  | 9   | 347               | TT | 596 | TC | 302 | CC | 749                  | TT | 1072 | TC | 412  | CC | 1.25       | 1.16-3.21   | 5.59x10 <sup>-6</sup>  |
| rs4977756  | 9   | 377               | AA | 594 | AG | 276 | GG | 782                  | AA | 1083 | AG | 370  | GG | 1.23       | 1.13-3.19   | 3.46x10 <sup>-5</sup>  |
| rs498872   | 11  | 156               | TT | 589 | TC | 502 | CC | 211                  | TT | 954  | TC | 1070 | CC | 1.27       | 1.17-3.23   | 5.07x10 <sup>-6</sup>  |
| rs6010620  | 20  | 46                | AA | 405 | AG | 796 | GG | 123                  | AA | 785  | AG | 1327 | GG | 1.20       | 1.08-3.16   | 0.0025                 |
| rs2297440  | 20  | 45                | TT | 397 | TC | 804 | CC | 119                  | TT | 777  | TC | 1330 | CC | 1.22       | 1.09-3.18   | 0.0016                 |
| rs7124728  | 11  | 76                | TT | 740 | TC | 431 | CC | 424                  | TT | 1145 | TC | 663  | CC | 1.53       | 1.42 - 3.49 | 2.56x10 <sup>-14</sup> |
| rs7300686  | 12  | 307               | TT | 454 | TC | 466 | CC | 586                  | TT | 1074 | TC | 508  | CC | 1.36       | 1.26 - 3.32 | 4.72x10 <sup>-10</sup> |
| rs17748    | 11  | 84                | TT | 487 | TC | 675 | CC | 119                  | TT | 753  | TC | 1363 | CC | 1.25       | 1.14 - 3.21 | 1.23x10 <sup>-4</sup>  |
| rs9656979  | 8   | 351               | TT | 630 | TC | 266 | CC | 742                  | TT | 1098 | TC | 393  | CC | 1.20       | 1.1 - 3.16  | 3.65x10 <sup>-4</sup>  |
| rs9369226  | 6   | 57                | AA | 428 | AG | 762 | GG | 73                   | AA | 659  | AG | 1502 | GG | 1.27       | 1.14 - 2.75 | 1.73x10 <sup>-4</sup>  |
| rs171125   | 16  | 19                | AA | 249 | AG | 978 | GG | 6                    | AA | 359  | AG | 1838 | GG | 1.43       | 1.26 - 3.39 | 2.33x10 <sup>-5</sup>  |
| rs6931798  | 6   | 56                | TT | 426 | TC | 765 | CC | 71                   | TT | 656  | TC | 1500 | CC | 1.26       | 1.14 - 3.22 | 2.11x10 <sup>-4</sup>  |
| rs6869535  | 5   | 28                | AA | 307 | AG | 912 | GG | 69                   | AA | 682  | AG | 1483 | GG | 1.32       | 1.19 - 3.28 | 5.17x10 <sup>-5</sup>  |
| rs2110922  | 2   | 188               | TT | 579 | TG | 478 | GG | 273                  | TT | 980  | TG | 957  | GG | 1.17       | 1.06 - 2.81 | 0.0016                 |
| rs2072532  | 2   | 390               | TT | 606 | TC | 251 | CC | 572                  | TT | 1128 | TC | 533  | CC | 1.21       | 1.11 - 3.17 | 1.71x10 <sup>-4</sup>  |
| rs7257116  | 19  | 148               | TT | 581 | TC | 518 | CC | 339                  | TT | 1095 | TC | 796  | CC | 1.22       | 1.12 - 3.18 | 1.36x10 <sup>-4</sup>  |
| rs1509937  | 10  | 517               | AA | 552 | AG | 178 | GG | 997                  | AA | 995  | AG | 243  | GG | 1.15       | 1.05 - 3.11 | 0.0062                 |

|            |    |     |    |     |    |      |    |      |    |     |    |      |    |      |             |                       |
|------------|----|-----|----|-----|----|------|----|------|----|-----|----|------|----|------|-------------|-----------------------|
| rs2206920  | 20 | 18  | AA | 239 | AG | 990  | GG | 18   | AA | 342 | AG | 1850 | GG | 1.32 | 1.16 - 3.28 | 8.44x10 <sup>-4</sup> |
| rs12531711 | 7  | 966 | AA | 262 | AG | 19   | GG | 1807 | AA | 407 | AG | 20   | GG | 1.23 | 1.08 - 3.19 | 0.0089                |
| rs10488631 | 7  | 965 | TT | 263 | TC | 19   | CC | 1810 | TT | 405 | TC | 20   | CC | 1.24 | 1.09 - 3.2  | 0.0063                |
| rs10924559 | 1  | 29  | AA | 324 | AG | 872  | GG | 52   | AA | 460 | AG | 1699 | GG | 1.25 | 1.10 - 2.76 | 0.0014                |
| rs1384847  | 4  | 0   | AA | 170 | AG | 1077 | GG | 28   | AA | 360 | AG | 1847 | GG | 1.40 | 1.21 - 3.36 | 3.85x10 <sup>-4</sup> |
| rs1941114  | 18 | 18  | AA | 268 | AG | 961  | GG | 60   | AA | 602 | AG | 1573 | GG | 1.39 | 1.20 - 2.68 | 8.90x10 <sup>-4</sup> |
| rs7325443  | 13 | 50  | TT | 427 | TC | 770  | CC | 73   | TT | 633 | TC | 1529 | CC | 1.27 | 1.15 - 3.23 | 1.54x10 <sup>-4</sup> |
| rs7325927  | 13 | 129 | TT | 456 | TC | 659  | CC | 147  | TT | 807 | TC | 1281 | CC | 1.22 | 1.07 - 2.78 | 3.27x10 <sup>-4</sup> |

**Supplementary Table 1:** Genotypes for the 34 SNPs in cases and controls in each of the case-control series. Also shown are Odds ratios and associated 95% confidence intervals, for each of the SNPs genotyped.



| rs2736100       | rs2853676 | Cases | Controls | OR   | 95% CI        | P                      |
|-----------------|-----------|-------|----------|------|---------------|------------------------|
| TT              | GG        | 678   | 1,414    | 1.00 | Reference     |                        |
| TT              | GA        | 91    | 164      | 1.13 | (0.86 - 1.49) | 0.37                   |
| TT              | AA        | 3     | 8        | 0.93 | (0.24 - 3.53) | 0.91                   |
| TG              | GG        | 975   | 1,521    | 1.33 | (1.18 - 1.5)  | 5.36x10 <sup>-6</sup>  |
| TG              | GA        | 1,158 | 1,569    | 1.53 | (1.36 - 1.73) | 3.17x10 <sup>-12</sup> |
| TG              | AA        | 60    | 73       | 1.67 | (1.17 - 2.39) | 0.005                  |
| GG              | GG        | 310   | 449      | 1.45 | (1.22 - 1.72) | 2.67x10 <sup>-5</sup>  |
| GG              | GA        | 654   | 842      | 1.64 | (1.43 - 1.88) | 2.75x10 <sup>-12</sup> |
| GG              | AA        | 372   | 390      | 1.97 | (1.66 - 2.33) | 7.77x10 <sup>-15</sup> |
| Per risk allele |           |       |          | 1.08 | (1.06-1.09)   | 1.19x10 <sup>-19</sup> |
| P interaction   |           |       |          |      |               | 0.308                  |

| rs4295627       | rs891835 | Cases | Controls | OR   | 95% CI        | P                      |
|-----------------|----------|-------|----------|------|---------------|------------------------|
| TT              | TT       | 3,349 | 2,044    | 1.00 | Reference     |                        |
| TT              | TG       | 951   | 573      | 1.02 | (0.90 - 1.15) | 0.76                   |
| TT              | GG       | 82    | 44       | 0.90 | (0.62 - 1.30) | 0.58                   |
| TG              | TT       | 538   | 384      | 1.19 | (1.03 - 1.38) | 0.02                   |
| TG              | TG       | 1,144 | 946      | 1.40 | (1.25 - 1.54) | 4.66x10 <sup>-10</sup> |
| TG              | GG       | 141   | 145      | 1.73 | (1.36 - 2.20) | 7.82x10 <sup>-6</sup>  |
| GG              | TT       | 16    | 17       | 1.89 | (0.95 - 3.78) | 0.07                   |
| GG              | TG       | 91    | 82       | 1.48 | (1.09 - 2.01) | 0.01                   |
| GG              | GG       | 84    | 116      | 2.35 | (1.76 - 3.14) | 7.04x10 <sup>-9</sup>  |
| Per risk allele |          |       |          | 1.08 | (1.07-1.11)   | 2.47x10 <sup>-19</sup> |
| P interaction   |          |       |          |      |               | 0.03                   |

| Haplotype* | Case frequency | Control frequency | P                      |
|------------|----------------|-------------------|------------------------|
| TG         | 0.409          | 0.467             | 4.23x10 <sup>-17</sup> |
| GA         | 0.296          | 0.247             | 5.1x10 <sup>-16</sup>  |
| GG         | 0.269          | 0.26              | 0.1439                 |
| TA         | 0.026          | 0.026             | 0.733                  |

\*Haplotype consists of rs2736100 and rs2853676

| Haplotype‡ | Case frequency | Control frequency | P                      |
|------------|----------------|-------------------|------------------------|
| TTATGT     | 0.424          | 0.462             | 2.00x10 <sup>-4</sup>  |
| TTACGT     | 0.202          | 0.198             | 0.6561                 |
| CGGCAG     | 0.143          | 0.099             | 7.46x10 <sup>-12</sup> |
| CGATGT     | 0.087          | 0.094             | 0.2041                 |
| TTGCAG     | 0.062          | 0.059             | 0.6354                 |
| TGGCAG     | 0.02           | 0.02              | 0.9459                 |
| TTGCAT     | 0.016          | 0.02              | 0.1366                 |
| TTACAT     | 0.015          | 0.017             | 0.4222                 |
| CTATGT     | 0.011          | 0.011             | 0.9447                 |

‡Haplotype consists of rs10464870, rs891835, rs6470745, rs9656979, rs16904140 and rs4295627

**Supplementary Table 2: Risk of glioma by combined genotypes for rs2736100-rs2853676 and rs4295627-rs891835.**

| <b>SNP</b>       | <b>Comparison</b>         | <b><i>P</i></b>       | <b>Between study <i>P</i></b> |
|------------------|---------------------------|-----------------------|-------------------------------|
| <b>rs4295627</b> | Glial vs GBM              | 2.52x10 <sup>-9</sup> | 0.111                         |
|                  | Astrocytic vs GBM         | 5.12x10 <sup>-5</sup> | 0.013                         |
|                  | Glial vs astrocytic       | 0.026                 | 0.016                         |
|                  | Glial & astrocytic vs GBM | 3.80x10 <sup>-8</sup> | 0.014                         |
| <b>rs498872</b>  | Glial vs GBM              | 0.009                 | 0.748                         |
|                  | Astrocytic vs GBM         | 0.030                 | 0.145                         |
|                  | Glial vs astrocytic       | 0.158                 | 0.406                         |
|                  | Glial & astrocytic vs GBM | 0.005                 | 0.999                         |
| <b>rs4977756</b> | Glial vs GBM              | 0.230                 | 9.60x10 <sup>-5</sup>         |
|                  | Astrocytic vs GBM         | 0.0008                | 0.003                         |
|                  | Glial vs astrocytic       | 0.411                 | 0.121                         |
|                  | Glial & astrocytic vs GBM | 0.010                 | 0.001                         |
| <b>rs2736100</b> | Glial vs GBM              | 3.30x10 <sup>-4</sup> | 0.069                         |
|                  | Astrocytic vs GBM         | 1.91x10 <sup>-4</sup> | 0.068                         |
|                  | Glial vs astrocytic       | 0.548                 | 0.172                         |
|                  | Glial & astrocytic vs GBM | 2.55x10 <sup>-5</sup> | 0.047                         |
| <b>rs6010620</b> | Glial vs GBM              | 0.003                 | 0.429                         |
|                  | Astrocytic vs GBM         | 0.138                 | 0.126                         |
|                  | Glial vs astrocytic       | 0.070                 | 0.003                         |
|                  | Glial & astrocytic vs GBM | 0.016                 | 0.043                         |

**Supplementary Table 3: Clinico-pathological association testing.** Tumors of glial origin defined by ICD-O codes 93803, 94423, 94503, 94513, GBM by ICD-O codes 94401-13, and astrocytic tumors by ICD-O codes 94003-245.

|                 | <i>TERT</i> | <i>CCDC26</i>    |                  |                                   |                                    |                  | <i>CDKN2A/B</i>  |                  |                  |                  | <i>PHLDB1</i>    | <i>RTEL1</i>     |                  |                  |
|-----------------|-------------|------------------|------------------|-----------------------------------|------------------------------------|------------------|------------------|------------------|------------------|------------------|------------------|------------------|------------------|------------------|
|                 | rs2853676   | rs10464870       | rs891835         | rs6470745                         | rs16904140                         | rs4295627        | rs1063192        | rs2157719        | rs1412829        | rs4977756        | rs498872         | rs6010620        | rs2297440        |                  |
| <i>TERT</i>     | rs2736100   | 0.31<br>(10,731) | 0.68<br>(10,800) | 0.73<br>(10,667)                  | 0.74<br>(10,850)                   | 0.30<br>(10,836) | 0.30<br>(10,846) | 0.34<br>(10,774) | 0.20<br>(10,825) | 0.41<br>(10,810) | 0.27<br>(10,811) | 0.55<br>(10,825) | 0.60<br>(10,763) | 0.63<br>(10,623) |
|                 | rs2853676   |                  | 0.26<br>(10,758) | 0.78<br>(10,629)                  | 0.38<br>(10,808)                   | 0.41<br>(10,798) | 0.41<br>(10,803) | 0.74<br>(10,739) | 0.85<br>(10,782) | 0.97<br>(10,777) | 0.40<br>(10,765) | 0.20<br>(10,783) | 0.66<br>(10,728) | 0.56<br>(10,598) |
| <i>CCDC26</i>   | rs10464870  |                  | 0.62<br>(10,705) | $5.57 \times 10^{-5}$<br>(10,887) | $3.92 \times 10^{-12}$<br>(10,880) | 0.02<br>(10,880) | 0.86<br>(10,813) | 0.80<br>(10,865) | 0.55<br>(10,848) | 0.73<br>(10,848) | 0.18<br>(10,860) | 0.94<br>(10,797) | 0.86<br>(10,661) |                  |
|                 | rs891835    |                  |                  | $1.56 \times 10^{-4}$<br>(10,753) | $1.45 \times 10^{-4}$<br>(10,740)  | 0.03<br>(10,747) | 0.77<br>(10,677) | 0.71<br>(10,728) | 0.53<br>(10,713) | 0.67<br>(10,711) | 0.24<br>(10,729) | 0.33<br>(10,668) | 0.22<br>(10,572) |                  |
|                 | rs6470745   |                  |                  |                                   | 0.33<br>(10,926)                   | 0.48<br>(10,933) | 0.17<br>(10,861) | 0.19<br>(10,911) | 0.51<br>(10,900) | 0.33<br>(10,898) | 0.39<br>(10,912) | 0.73<br>(10,846) | 0.61<br>(10,711) |                  |
|                 | rs16904140  |                  |                  |                                   |                                    | 0.26<br>(10,923) | 0.41<br>(10,852) | 0.49<br>(10,898) | 0.96<br>(10,888) | 0.50<br>(10,884) | 0.41<br>(10,903) | 0.89<br>(10,836) | 0.78<br>(10,703) |                  |
|                 | rs4295627   |                  |                  |                                   |                                    |                  | 0.38<br>(10,859) | 0.39<br>(10,911) | 0.82<br>(10,896) | 0.49<br>(10,894) | 0.44<br>(10,909) | 0.75<br>(10,846) | 0.73<br>(10,708) |                  |
| <i>CDKN2A/B</i> | rs1063192   |                  |                  |                                   |                                    |                  |                  | 0.60<br>(10,838) | 0.58<br>(10,827) | 0.76<br>(10,831) | 0.73<br>(10,839) | 0.87<br>(10,772) | 0.97<br>(10,636) |                  |
|                 | rs2157719   |                  |                  |                                   |                                    |                  |                  |                  | 0.54<br>(10,874) | 0.54<br>(10,874) | 0.70<br>(10,889) | 0.80<br>(10,823) | 0.87<br>(10,687) |                  |
|                 | rs1412829   |                  |                  |                                   |                                    |                  |                  |                  |                  | 0.59<br>(10,857) | 0.44<br>(10,873) | 0.60<br>(10,814) | 0.65<br>(10,674) |                  |
|                 | rs4977756   |                  |                  |                                   |                                    |                  |                  |                  |                  |                  | 0.29<br>(10,869) | 0.70<br>(10,808) | 0.84<br>(10,670) |                  |
| <i>PHLDB1</i>   | rs498872    |                  |                  |                                   |                                    |                  |                  |                  |                  |                  |                  | 0.19<br>(10,820) | 0.12<br>(10,690) |                  |
| <i>RTEL1</i>    | rs6010620   |                  |                  |                                   |                                    |                  |                  |                  |                  |                  |                  |                  | 0.28<br>(10,632) |                  |

**Supplementary Table 4:** Pairwise analysis of all SNPs associated with glioma risk. For each row-column combination, numbers show the *P* value for inclusion of an interaction term between the two SNPs. Numbers in parentheses are the number of samples from which statistics are calculated.

| Number of risk alleles | Controls (%) | Cases (%)    | OR (95% CI)                                                                |
|------------------------|--------------|--------------|----------------------------------------------------------------------------|
| 0-1                    | 153 (2.39)   | 39 (0.94)    | 0.5 (0.35 - 0.71)                                                          |
| 2                      | 454 (7.09)   | 170 (4.08)   | 0.73 (0.6 - 0.89)                                                          |
| 3                      | 1122 (17.51) | 548 (13.14)  | 0.96 (0.84 - 1.09)                                                         |
| 4                      | 1885 (29.43) | 964 (23.12)  | 1 (0.9 - 1.12)                                                             |
| 5                      | 1662 (25.94) | 1137 (27.27) | 1.34 (1.2 - 1.49)                                                          |
| 6                      | 810 (12.64)  | 833 (19.98)  | 2.01 (1.78 - 2.28)                                                         |
| 7                      | 270 (4.21)   | 356 (8.54)   | 2.58 (2.16 - 3.07)                                                         |
| 8+                     | 50 (0.78)    | 123 (2.95)   | 4.81 (3.43 - 6.74)                                                         |
| Total                  | 6406 (100)   | 4170 (100)   | 1.31 (1.26 - 1.36) per allele<br>$P_{\text{trend}} = 1.39 \times 10^{-74}$ |

**Supplementary Table 5: Odds ratios corresponding to increasing numbers of risk alleles in rs4295627 (*CCDC26*), rs498872 (*PHLDB1*), rs497756 (*CDKN2A*, *CDKN2B*), rs2736100 (*TERT*) and rs6010620 (*RTEL1*). The median number of risk alleles, 4, is used as the reference group for the odds ratios.**
